1 **Epigenomic profiling of stem cells within the pilosebaceous unit identifies**  
2 **PRDM16 as a regulator of sebaceous gland homeostasis**

3  
4 Rizwan Rehimi<sup>1,2</sup>, Giuliano Crispantu<sup>1,2,3</sup>, Carlos Andrés Chacón-Martínez<sup>2,5</sup>, Tore  
5 Bleckwehl<sup>1</sup>, Giada Mantellato<sup>1</sup>, Gökçen Gözüm<sup>1</sup>, Mathieu Clément-Ziza<sup>8</sup>, Sara A.  
6 Wickström<sup>2,5,7</sup>, Catherin Niemann<sup>1,2,6</sup>, Carien Niessen<sup>1,2#</sup>, Alvaro Rada-Iglesias<sup>1,2,4#</sup>.

- 7  
8 1. Center for Molecular Medicine Cologne (CMMC) University of Cologne, Germany.  
9 2. Cluster of Excellence for Aging Research (CECAD), University of Cologne,  
10 Germany.  
11 3. Dept. of Internal Medicine II, University Hospital Cologne, Germany.  
12 4. Instituto de Biomedicina y Biotecnología de Cantabria (IBBTEC), CSIC-  
13 Universidad de Cantabria-SODERCAN, Santander, Spain.  
14 5. Max Planck Institute for Biology of Ageing, 50931 Cologne, Germany.  
15 6. Institute for Biochemistry II, University of Cologne, Cologne, 50931, Germany.  
16 7. Helsinki Institute of Life Science, Biomedicum Helsinki, University of Helsinki,  
17 00290 Helsinki, Finland; Wihuri Research Institute, Biomedicum Helsinki,  
18 University of Helsinki, 00290 Helsinki, Finland; Stem Cells and Metabolism  
19 Research Program, Faculty of Medicine, University of Helsinki, 00290 Helsinki,  
20 Finland.  
21 8. Lesaffre International, Marcq-en-Baroeul, France

22  
23 #Corresponding authors: [alvaro.rada@unican.es](mailto:alvaro.rada@unican.es); [carien.niessen@uni-koeln.de](mailto:carien.niessen@uni-koeln.de)

24  
25  
26  
27  
28  
29  
30  
31

## 32 **Abstract**

33 The epidermis consists of different compartments such as the hair follicle (HF),  
34 sebaceous gland (SG) and interfollicular epidermis (IFE), each containing distinct stem  
35 cell (SC) populations. However, with the exception of the SCs residing within the HF  
36 bulge, other epidermal SC populations remain less well understood. Here we used an  
37 epigenomic strategy that combines H3K27me3 ChIP-seq and RNA-seq profiling to  
38 identify major regulators of pilosebaceous unit (PSU) SC located outside the bulge.  
39 When applied to the bulk of PSU SC isolated from mouse skin our approach identified  
40 both previously known and potentially novel non-bulge PSU SC regulators. Among the  
41 latter, we found that PRDM16 was predominantly enriched within the Junctional Zone  
42 (JZ), which harbors SC that contribute to renewal of the upper HF and the SG. To  
43 investigate PRDM16 function in the PSU SC, we generated an epidermal-specific  
44 *Prdm16* Knock-out mouse model (K14-Cre-Prdm16<sup>fl/fl</sup>). Notably, SG homeostasis was  
45 disturbed upon loss of PRDM16 resulting in enlarged SGs, and excessive sebum  
46 production, resembling some of the features associated with human acne and  
47 sebaceous hyperplasia. Importantly, PRDM16 is essential to shut down proliferation in  
48 differentiating sebocytes. Overall, our study provides a list of putative novel regulators of  
49 PSU SC outside the bulge and identifies PRDM16 as a major regulator of SG  
50 homeostasis.

51  
52 **Keywords:** Hair follicle, stem cells, epigenomics, Prdm16, skin homeostasis, sebaceous  
53 glands, junctional zone, bulge, pilosebaceous unit, epidermis.

54  
55  
56  
57  
58  
59  
60  
61  
62  
63

## 64 **Introduction**

65 Adult tissue homeostasis requires equilibrium between cell proliferation and  
66 differentiation, which is largely dependent on resident SCs that can both self-renew and  
67 differentiate into the various cells types found within each tissue (Morrison and  
68 Spradling, 2008). SCs reside in unique microenvironments termed “niches”, which are  
69 important for the maintenance of the SCs’ unique properties (Fuchs et al., 2004; Watt  
70 and Hogan, 2000). Epithelia, one of the four tissue types of the body, are typically highly  
71 heterogeneous, containing multiple SC populations that are physically and functionally  
72 compartmentalized (Donati et al., 2015). The epidermis is a major example of an adult  
73 epithelial tissue in which various SC populations with a spatially confined distribution  
74 participate in both skin homeostasis and regeneration upon injury (Jaks et al., 2010;  
75 Schepeler et al., 2014). The major components of the mammalian epidermis are the  
76 interfollicular epidermis (IFE), the hair follicles (HF) and the sebaceous glands (SG).  
77 Several SC populations residing in different locations within the HF and the IFE have  
78 been previously described (e.g. HF bulge, HF germ (HG), isthmus, junctional zone (JZ),  
79 basal layer of the IFE) (Jaks et al., 2010; Schepeler et al., 2014; Blanpain and Fuchs,  
80 2009). Under normal conditions, each of these SC populations contributes to the  
81 homeostasis of specific epidermal compartments. However, upon injury, SCs typically  
82 restricted to one compartment can contribute to the regeneration/repair of the whole  
83 epidermis (Chuong et al., 2007; Jones et al., 2007; Jensen et al., 2009).

84  
85 Among the epidermal SCs, the best molecularly characterized population is located  
86 within the HF bulge and marked by e.g. keratin 15 and CD34 (Blanpain et al., 2004;  
87 Morris et al., 2004). During each hair growth cycle, bulge SC contribute to the formation  
88 of the non-permanent lower hair structures (*i.e.* hair shaft, inner root sheath, outer root  
89 sheath) (Alcolea and Jones, 2014). Furthermore, under homeostatic conditions, bulge  
90 SC minimally contribute to the maintenance of the upper part of the HF, the SG or the  
91 IFE (Ito et al., 2005). However, upon injury, bulge SC display increased plasticity and  
92 differentiation potential, participating in the wound healing response and contributing  
93 temporarily to the regeneration of all the other epidermal compartments (Ito et al., 2005).  
94 Despite recent advances based on the use of single-cell RNA-seq profiling (Joost et al.,  
95 2016; Joost et al., 2018), the SC populations residing within the PSU but located outside

96 the HF bulge (i.e. JZ, SG basal layer, isthmus and infundibulum) remain less well  
97 characterized at the molecular level (Jaks et al., 2010; Schepeler et al., 2014). Among  
98 them, those SC residing at the intersection between the HF, SG and IFE (i.e. the JZ) are  
99 characterized by expression of high levels of LRIG1. Compared to bulge HFSC, the JZ  
100 SC do not express CD34 and show higher proliferative activity (Page et al., 2013).  
101 Under homeostatic conditions, these JZ SC maintain the infundibulum and the SG,  
102 without contributing to neither the HF nor the IFE (Page et al., 2013). In addition, upon  
103 epidermal wounding, JZ SC are mobilized similarly to bulge SC and can participate in  
104 the regeneration of all the epidermal compartments (Page et al., 2013). However, in  
105 contrast to the bulge HFSC, the intrinsic regulators and transcriptional networks that  
106 control the identity and function of JZ SC are not fully understood (Donati et al., 2017;  
107 Jensen et al., 2009; Page et al., 2013).

108  
109 The JZ connects the HF with the SG, an important skin appendage that contains lipid-  
110 filled cells known as sebocytes. Sebocytes frequently undergo lysis in order to release a  
111 distinct mixture of lipids (i.e. sebum) that, through a specialized canal, finally reaches the  
112 skin surface. Sebum helps to reduce water loss from the skin surface, has antimicrobial  
113 activity, is an important source of antioxidants and participates in thermoregulation  
114 (Brogden et al., 2012; Fischer et al., 2013; Drake et al., 2008; Schneider and Paus,  
115 2009; Fluhr et al., 2003; Thody and Shuster, 1989). SG homeostasis requires the  
116 renewal of the sebocytes undergoing lysis, which depends, at least partly, on Lrig1+  
117 SCs located at the basal layer of the JZ (Jensen et al., 2009; Frances and Niemann  
118 2012; Niemann and Horsley 2012; Thody et al., 1989). Some transcription factors,  
119 including PRMD1/BLIMP1 and GATA6, have been implicated in SG maintenance and in  
120 controlling the differentiation of Lrig1+ SC into sebocytes (Oules et al., 2019; Oules et  
121 al., 2020; Donati et al., 2017; Horsley et al., 2006; Feldman et al., 2019; Kretzchmar et  
122 al., 2014). However, the current view of the transcriptional regulators that define the  
123 Lrig1+ SC identity and control their contribution to both SG and infundibulum/IFE  
124 homeostasis is likely to be incomplete.

125  
126 We previously showed that, by combining H3K27me3 ChIP-seq and RNA-seq profiling,  
127 the main regulators of the different cell types found within a heterogeneous population

128 can be identified by those genes that, although highly expressed, are embedded within  
129 broad H3K27me3 domains (Rehimi et al., 2016; Schertel et al., 2015; Shim et al., 2020).  
130 Using this simple epigenomic approach to dissect epidermal SC heterogeneity, here we  
131 identified several putative regulators of non-bulge SCs. Among them, we found that  
132 PRDM16 was co-expressed with LRIG1 within the JZ (Jensen et al., 2009; Frances and  
133 Niemann 2012). PRDM16 belongs to the PRDM family of transcription factors and was  
134 previously reported as a master regulator of brown fat cell identity (Seale et al., 2008;  
135 Kajimura et al., 2009). Here we show that the conditional loss of PRDM16 in the  
136 epidermis lead to enlarged and disorganized SGs and impaired sebum secretion.  
137 Overall, our work uncovered PRDM16 as a novel marker of the JZ and an important  
138 regulator of SG cell fate and homeostasis, which could provide important insights into  
139 the molecular basis of common human skin conditions (Shamloul et al., 2020).

140

## 141 **Results**

### 142 **Epigenomic-based dissection of SC heterogeneity within the pilosebaceous unit**

143 To separate and analyze the bulk of SC present in the PSU but not in the interfollicular  
144 epidermis, we used fluorescence activated cell sorting (FACS) to isolate ITGA6<sup>+</sup>/Sca1<sup>-</sup>  
145 cells from the skin of 2<sup>nd</sup> telogen-stage mice (P56) (Fig 1A, Fig 1 – figure supplement  
146 1A). Once ChIP for histone modifications was optimized in these FACS-sorted cells (Fig  
147 1 – figure supplement 1B), RNA-seq and ChIP-seq profiles for H3K4me3 and  
148 H3K27me3 were generated (~5x10<sup>5</sup> ITGA6<sup>+</sup>/Sca1<sup>-</sup> cells/ChIP; 1-2 mice) (Fig 1A). The  
149 quality of the ChIP-seq profiles is illustrated by the sharp demarcation of the HOX gene  
150 clusters into two broad H3K4me3/active and H3K27me3/inactive domains (Fig 1 – figure  
151 supplement 1C). Similarly, housekeeping genes with ubiquitous expression (e.g. TBP)  
152 were marked by H3K4me3 but not H3K27me3 (Fig 1 – figure supplement 1D), while  
153 non-epidermal cell identity regulators (e.g. SOX17) were embedded within broad  
154 H3K27me3 domains without H3K4me3 enrichment (Fig 1 – figure supplement 1E).

155

156 To identify important regulators of HFSC populations residing outside the bulge, a  
157 differential functional heterogeneity score (dFH score) (Rehimi et al., 2016) was  
158 calculated for each gene by multiplying the breadth of the H3K27me3 domain (in bp)  
159 around its transcriptional start site (TSS) in ITGA6<sup>+</sup>/Sca1<sup>-</sup> cells by its differential

**Fig 1**

**A**

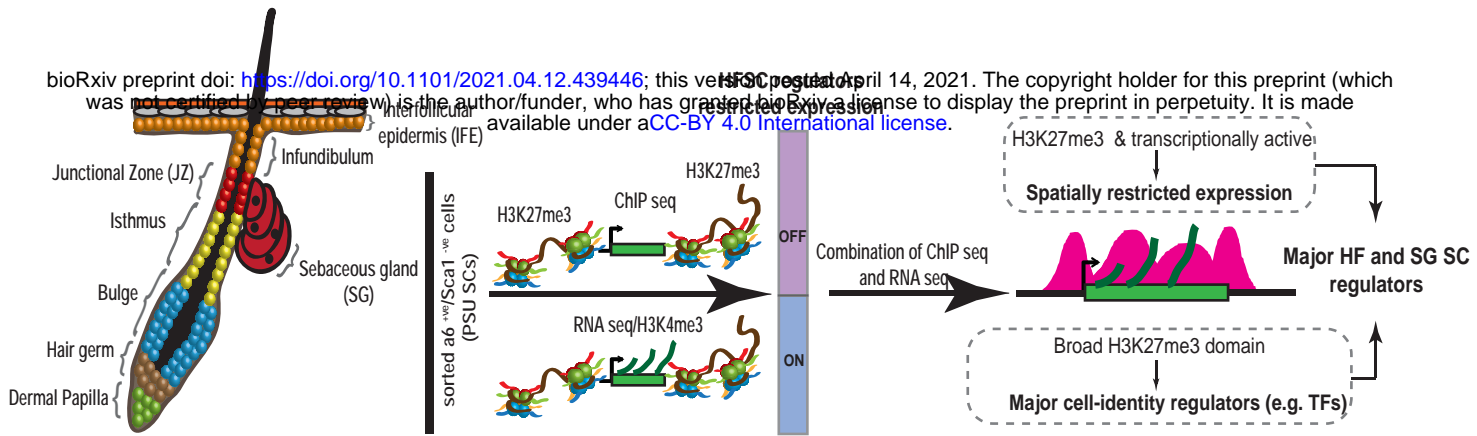

**B**

**Differential Functional Heterogeneity Score**  
 $dFH_g = (H3K27me3B_g + 1) \times \log_2(DE_g\_FoldChange) \times -\log(DE_g\_qValue)$

**Top 100 dFH Score genes**

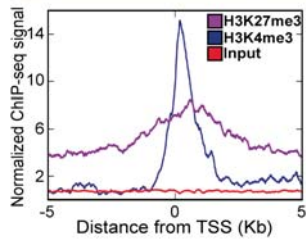

**C**

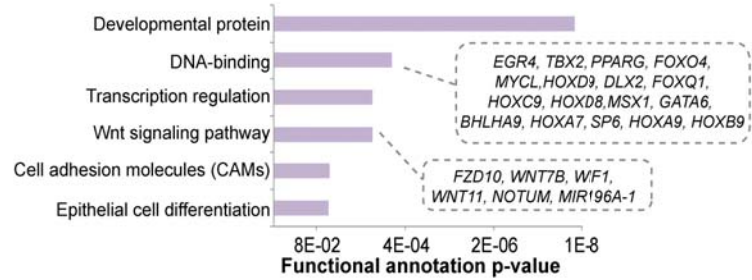

**D**

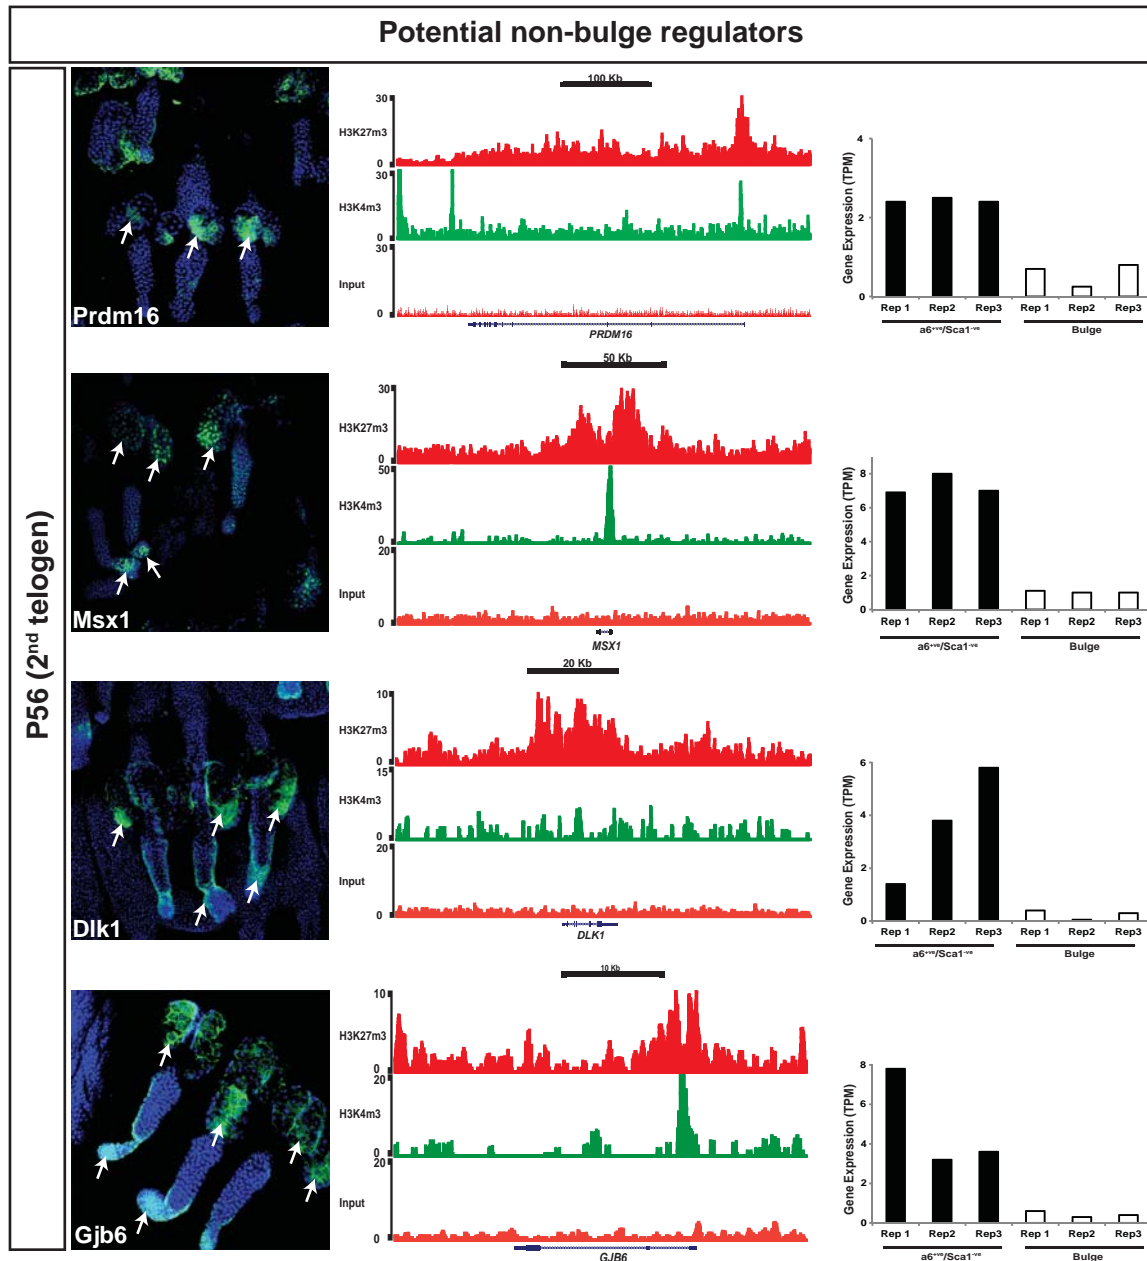

160 **Figure 1. Epigenomic strategy to predict non-bulge stem cell regulators in the**  
161 **mice pilosebaceous unit (PSU).**

162 **(A)** Schematic diagram of the epigenomic strategy used to molecularly dissect SC  
163 heterogeneity within the  $\alpha 6^{+ve}/Sca1^{-ve}$  HF and SG cells isolated from the back skin of  
164 P56 mice (2<sup>nd</sup> telogen). Genes with spatially restricted expression within the  
165 pilosebaceous unit can be identified as those that are marked by H3K27me3 and  
166 transcriptionally active (as measured by RNA-seq). Among them, those covered by  
167 particularly broad H3K27me3 domains are likely to represent major SC regulators with  
168 important roles in skin homeostasis and/or regeneration.

169 **(B)** For each mouse gene, the dFH score was computed taking into account the size of  
170 the H3K27me3 blocks measured in  $\alpha 6^{+ve}/Sca1^{-ve}$  cells and the differential expression  
171 between  $\alpha 6^{+ve}/Sca1^{-ve}$  cells and bulge SC. The average H3K27me3 and H3K4me3  
172 ChIP-seq profiles are shown for the top 100 genes with the highest dFH scores in  
173  $\alpha 6^{+ve}/Sca1^{-ve}$  cells.

174 **(C)** The top 100 genes with the highest dFH scores in  $\alpha 6^{+ve}/Sca1^{-ve}$  HFSCs were  
175 functionally annotated according to Gene Ontology biological process terms.

176 **(D)** ChIP-seq profiles from  $\alpha 6^{+ve}/Sca1^{-ve}$  cells and RNA-seq expression values from  
177  $\alpha 6^{+ve}/Sca1^{-ve}$  cells and bulge SC are shown around *Prdm16*, *Msx1*, *Dlk1* and *Gjb6*.  
178 Based on immunofluorescence assays the four previous genes showed spatially  
179 restricted expression within the pilosebaceous unit that was preferentially observed  
180 outside the bulge. All cross-sections were obtained from back skin of P56 (2<sup>nd</sup> telogen)  
181 mice.

182

183

184

185

186

187

188

189

190

191 expression between  $ITGA6^+/Sca1^-$  and bulge SC ( $dFH=(H3K27_{breath}+1) \times$   
192  $\log_2\text{FoldChange} \times -\log(\text{differential\_expression\_qValue})$ ; Methods) (Fig 1B, Data S1). In  
193 principle, genes with high dFH scores should represent major cell-identity regulatory  
194 expressed by a subset of PSU SC located outside the bulge (e.g. SG, JZ, Isthmus, hair  
195 germ). Next, we ranked all non-bulge genes according to their dFH scores and then  
196 focused on those with the highest scores (Fig 1B-C). When analyzed together, the top  
197 dFH genes were strongly marked with both H3K27me3 and H3K4me3 and were highly  
198 enriched in transcription factors and signaling pathways, some of which were previously  
199 implicated in normal skin homeostasis (e.g., *Wnt11*, *Wif1*, *Sp6*, *Fzd10* and *Gata6*) (Fig.  
200 1B-C). Moreover, recently described regulators of non-bulge PSU SC (e.g. *GATA6* and  
201 *FOXi3* (Wang et al., 2017; Shirokova et al., 2016; Donati et al., 2017) were also found  
202 among the top genes with the highest dFH scores (Fig 1 – figure supplement 1F-G),  
203 thus illustrating the specificity and sensitivity of our approach (Rehimi et al., 2016).

204  
205 **Genes predicted as non-bulge SC regulators display spatially restricted**  
206 **expression within the pilosebaceous unit.**

207 We noticed that among the top 200 dFH score genes, there were several that were not  
208 previously described as expressed or relevant for PSU SC function. Four of these genes  
209 were selected (i.e. *Prdm16*, *Gjb6*, *Msx1* and *Dlk1*) and their expression patterns were  
210 investigated by immunofluorescence in the skin of P56 mice (2<sup>nd</sup> telogen). Importantly, in  
211 agreement with our predictions, all four genes displayed spatially restricted expression  
212 within the HF and either low or no expression within the bulge (Fig. 1D). More  
213 specifically, PRDM16 was highly expressed within the JZ and the SG, while the other  
214 three genes (i.e. MSX1, DLK1 and GJB6) were mostly expressed in the HG and the SG.  
215 Moreover, we also observed the expression of DLK1 in lower bulge SC.

216  
217 Next, we selected *Prdm16* for further functional characterization, as it belongs to the  
218 PRDM family of transcription factors, which have major roles in the control of cellular  
219 identity under both physiological and pathological conditions (Fog et al., 2012;  
220 Hohenauer and Moore 2012). PRDM16 controls the cell fate between muscle and brown  
221 fat cells and its loss from brown fat promotes muscle differentiation (Seale et al., 2008).  
222 However, its functional relevance during skin homeostasis was unknown. To more



**Fig. 2****A**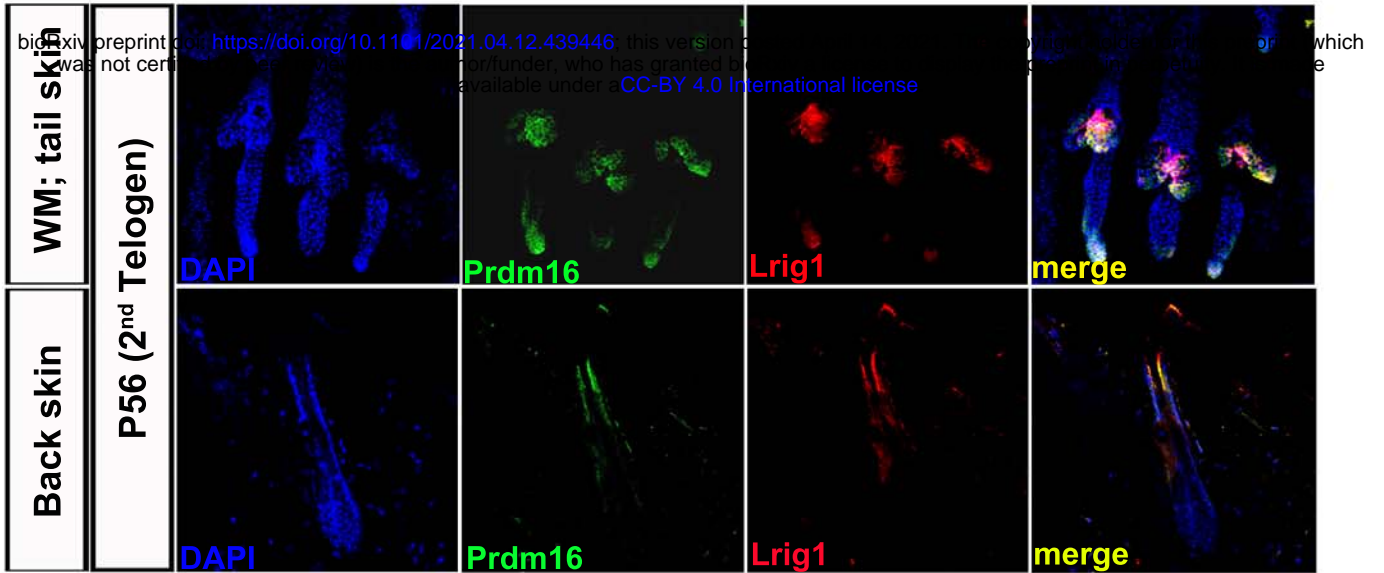**B**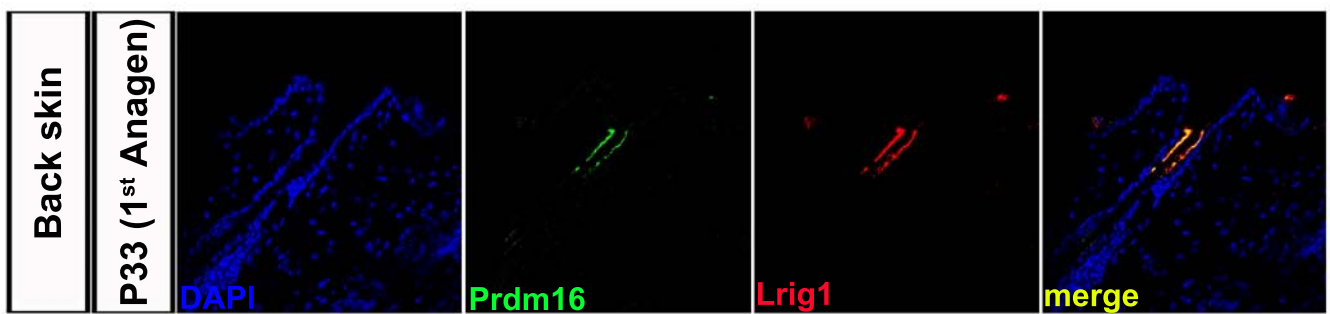**C**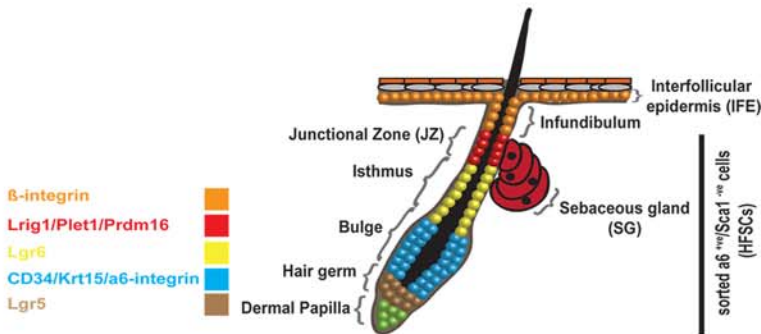**D**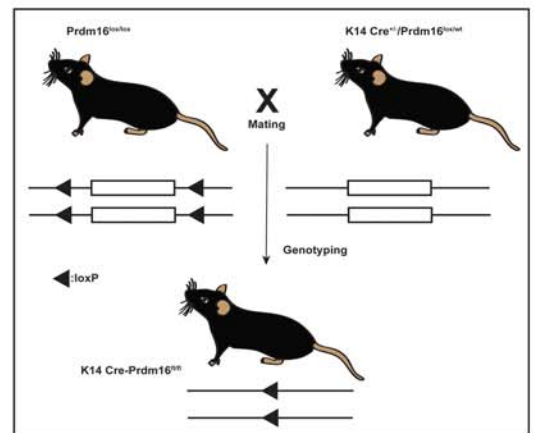**Epidermal-specific Prdm16 knock-out mouse model****E**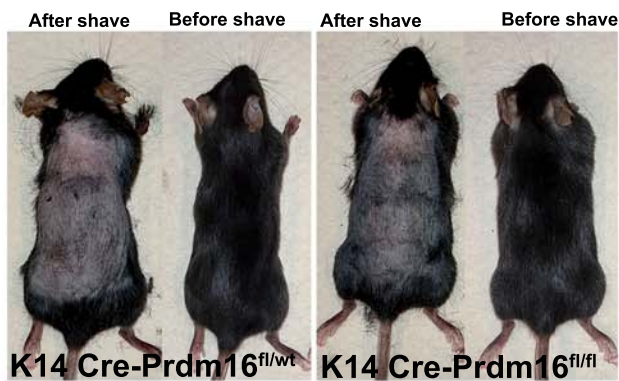**F**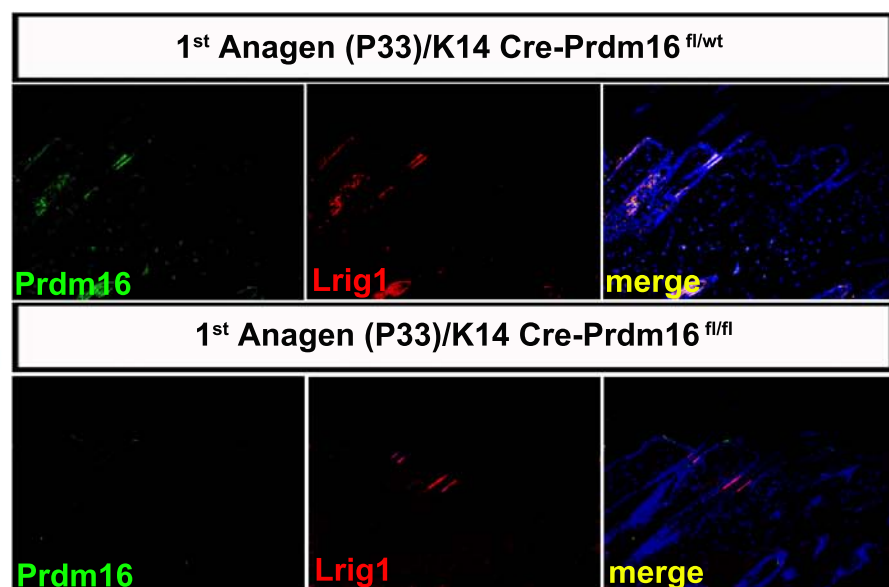

223 **Figure 2. Characterization of PRDM16 expression in the skin and generation of an**  
224 **epidermal-specific *Prdm16* Knock-out mouse model.**

225 **(A-B)** Double immunofluorescence for PRDM16/LRIG1 in tail skin whole mounts from  
226 (A) P56 (2<sup>nd</sup> telogen) mice (upper row) and back skin sections from P56 (2<sup>nd</sup> telogen)  
227 (bottom row) or (B) P33 (1<sup>st</sup> anagen) mice. PRDM16 extensively co-localizes with  
228 LRIG1, particularly within the JZ.

229 **(C)** Schematic diagram of epidermal SC compartments in mouse skin during 2<sup>nd</sup> telogen  
230 (P56). The expression of several SC markers is shown in different colors, with the  
231 expression domain of PRDM16 within the JZ showed in Red.

232 **(D)** Schematic diagram depicting the breeding strategy used to generate an epidermal-  
233 specific *Prdm16* Knock-out mouse model (K14-Cre-*Prdm16*<sup>fl/fl</sup>).

234 **(E)** The specific loss of *Prdm16* in the epidermis (K14-Cre-*Prdm16*<sup>fl/fl</sup>) did not result in  
235 any obvious morphological or fur differences in comparison with wild-type mice (K14  
236 Cre-*Prdm16*<sup>fl/wt</sup>).

237 **(F)** Double immunofluorescence for PRDM16 and LRIG1 in back skin sections from P33  
238 (1<sup>st</sup> anagen) mice that were either WT (K14 Cre-*Prdm16*<sup>fl/wt</sup>; upper row) or deficient for  
239 PRDM16 in the epidermis (K14-Cre-*Prdm16*<sup>fl/fl</sup>).

240

241

242

243

244

245

246

247

248

249

250

251

252

253

254 precisely define the SC population in which PRDM6 is expressed within the  
255 pilosebaceous unit, we performed double immunostainings for PRDM16 and LRIG1 in  
256 back skin sections and tail whole mounts. Remarkably, PRDM16 and LRIG1 showed  
257 highly overlapping expression patterns during both 2<sup>nd</sup> telogen (P56) and 1<sup>st</sup> anagen  
258 (P33, especially in the JZ (Fig 2A-B). Moreover, in the tail skin of P56 mice, both  
259 proteins were also co-expressed in the HG and the SGs (Fig 2A), although HG  
260 expression might be artifactual as it was not reproducibly observed among replicates  
261 (Fig 1D). Overall, these results show that PRDM16 represents a novel marker for the JZ  
262 SC (*i.e.* Lrig1<sup>+</sup> SC) (Fig 2C) and suggest a potential role in the homeostasis of the SG  
263 and/or the infundibulum (Jensen et al., 2009).

### 264 265 **Skin-specific loss of PRDM16 causes enlarged sebaceous glands and increased** 266 **sebum production**

267 To study the functional role of *Prdm16* during skin homeostasis, we crossed previously  
268 generated *Prdm16<sup>fl/fl</sup>* mice (Corrigan et al., 2018) with mice expressing Cre recombinase  
269 under the control of the human *Keratin-14* promoter (Hafner et al., 2004) (Fig 2D). This  
270 allowed us to obtain K14-Cre-*Prdm16<sup>fl/fl</sup>* mice in which *Prdm16* was specifically deleted  
271 in the basal layer of the skin and the PSU, including the undifferentiated cells of the  
272 sebaceous gland (Fig. 2D, Fig 2 – figure supplement 1A-B). Upon initial evaluation, the  
273 K14-Cre-*Prdm16<sup>fl/fl</sup>* mice did not show any gross morphological abnormalities and their  
274 fur appear normal (Fig. 2E). Immunofluorescence analyses in tail skin whole mounts and  
275 back skin sections confirmed that PRDM16 was barely detectable in K14-Cre-*Prdm16<sup>fl/fl</sup>*  
276 mice, while Lrig1 levels appeared unaffected in both the JZ and the SGs (Fig. 2F and  
277 Fig 2 – figure supplement 1C). These results indicate that Lrig1 expression is not  
278 affected by the loss of PRDM16.

279  
280 Next, to evaluate whether any structural changes occurred in the skin of K14-Cre-  
281 *Prdm16<sup>fl/fl</sup>* mice, back skin sections from 1<sup>st</sup> and 2<sup>nd</sup> telogen (P23 and P56 respectively)  
282 mice were stained with H&E. Notably, these stainings revealed that the loss of *Prdm16*  
283 led to a clear enlargement of the SGs (Fig. 3A), while the infundibulum and the rest of  
284 the HF appeared to be normal. Furthermore, Nile Red staining during multiple stages of  
285 the hair cycle (*i.e.* P23/P33/P56/P63) confirmed that the SGs of the K14-Cre-*Prdm16<sup>fl/fl</sup>*

**Fig 3**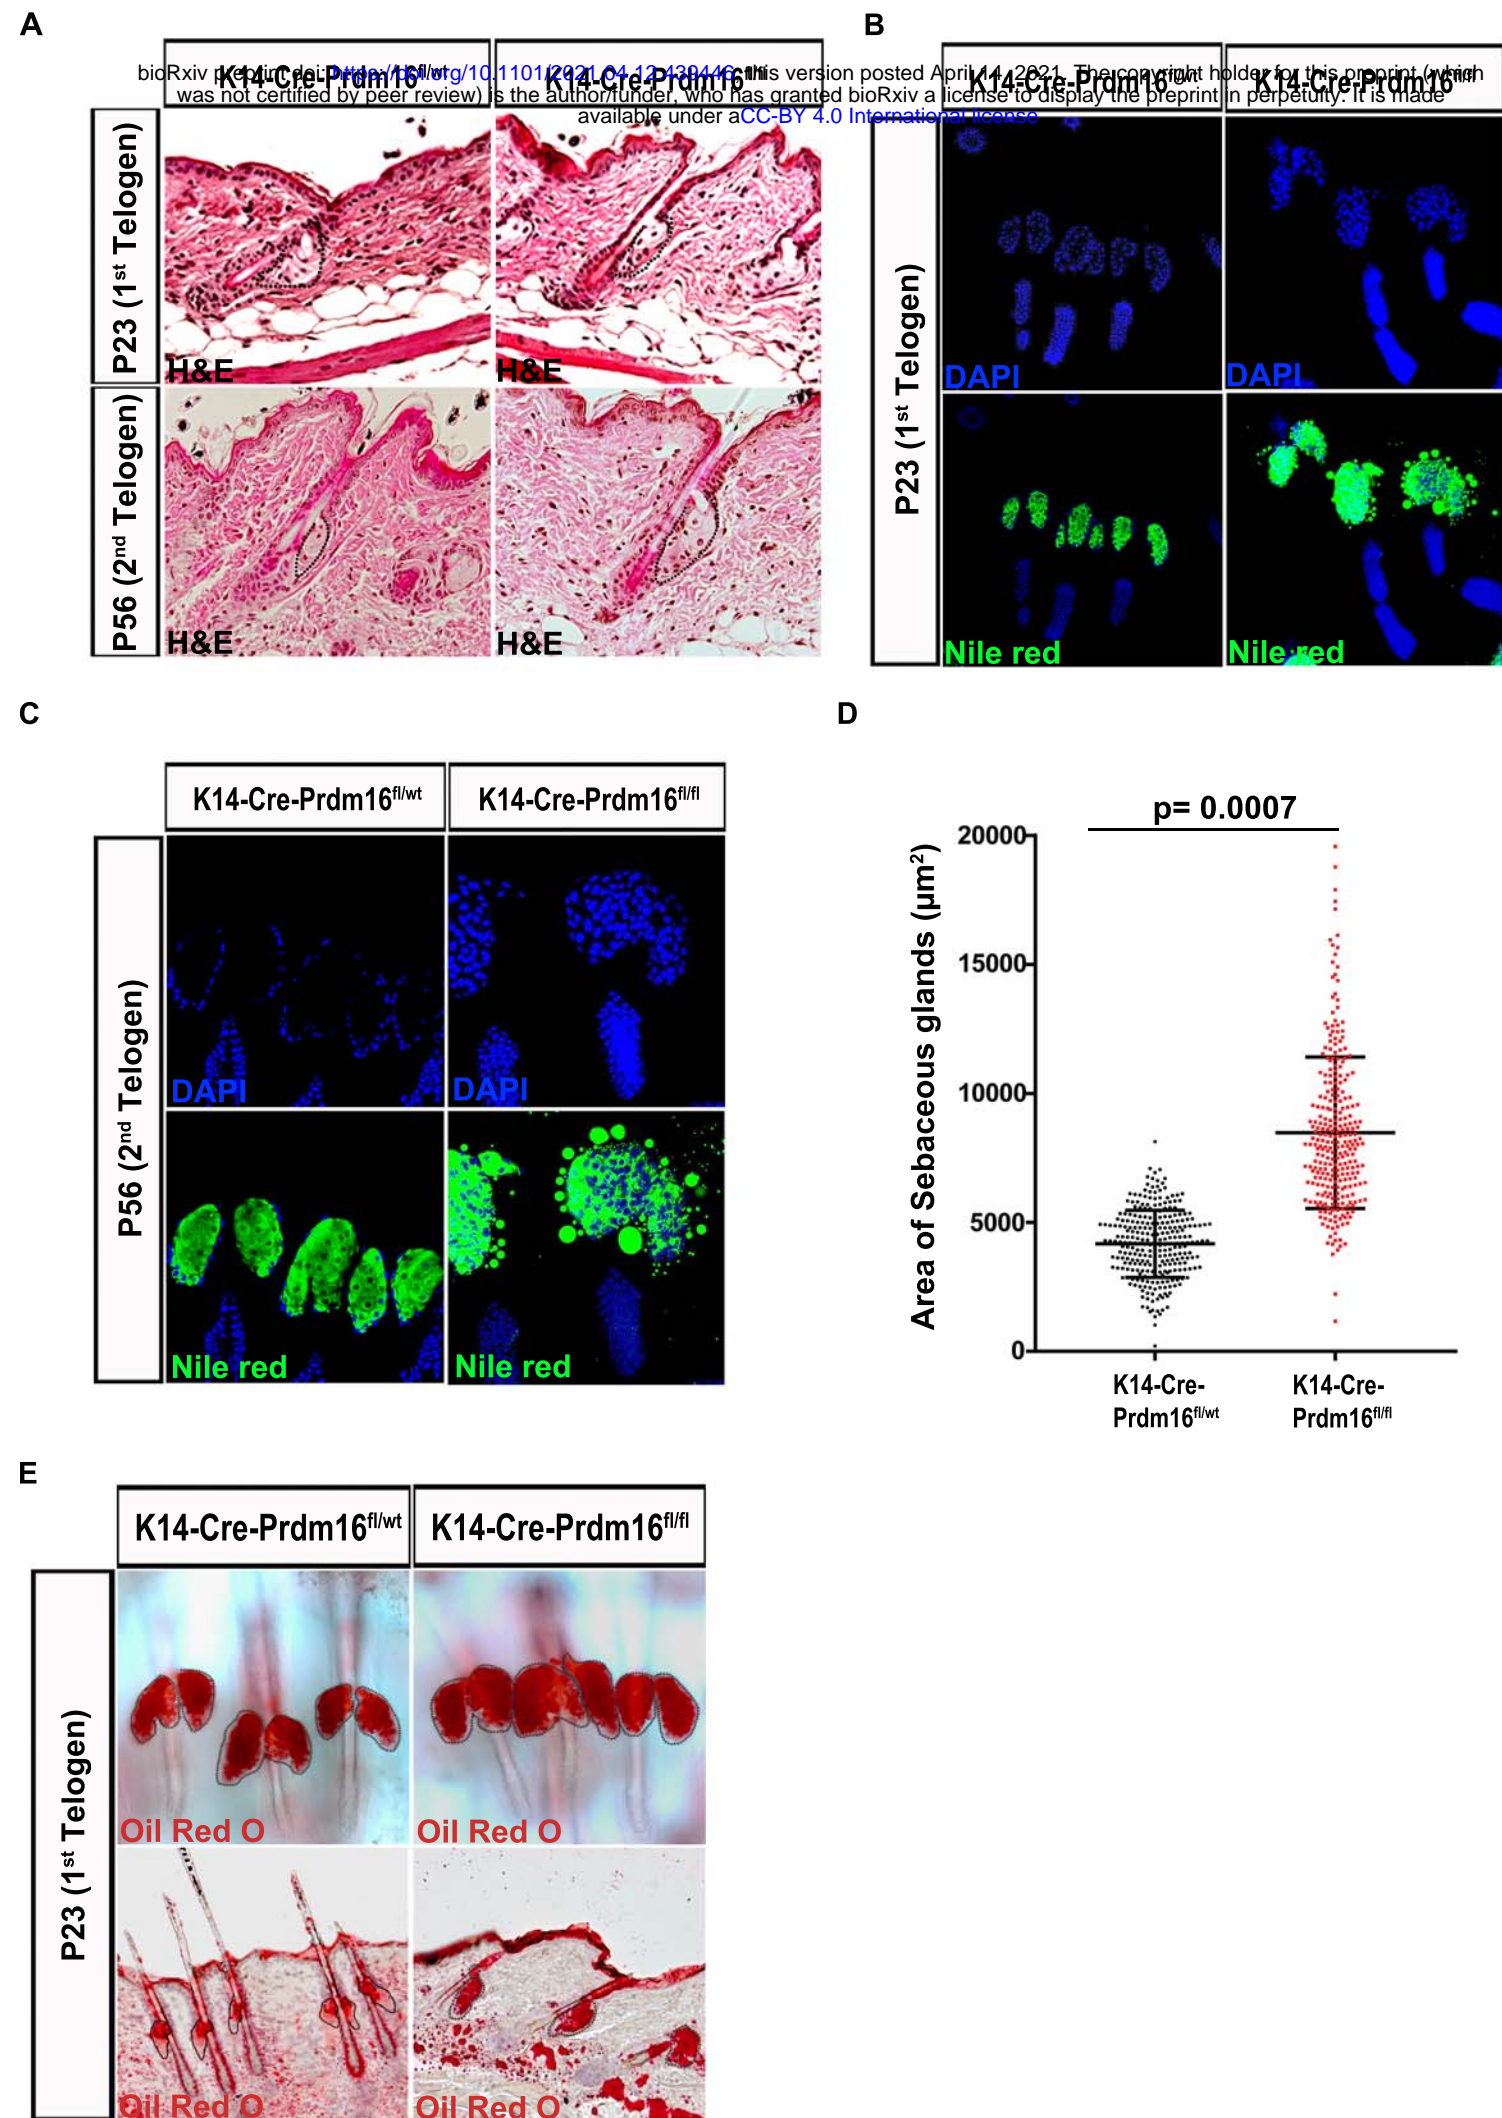

286 **Figure 3. The conditional loss of PRDM16 in the skin causes an enlargement of**  
287 **the sebaceous glands and increased sebum production.**

288 **(A)** Back skin sections from P23 and P56 mice that were either WT (K14 Cre-  
289 Prdm16<sup>fl/wt</sup>; left) or deficient for PRDM16 in the epidermis (K14-Cre-Prdm16<sup>fl/fl</sup>; right)  
290 were stained with hematoxylin and eosin (H&E). The SGs, which appear enlarged in  
291 K14-Cre-Prdm16<sup>fl/fl</sup> mice, are marked with a dotted line.

292 **(B-C)** Back skin sections from (B) P23 (1<sup>st</sup> telogen) and (C) P56 (2<sup>nd</sup> telogen) mice that  
293 were either WT (K14 Cre-Prdm16<sup>fl/wt</sup>; left) or deficient for PRDM16 in the epidermis  
294 (K14-Cre-Prdm16<sup>fl/fl</sup>; right) were stained with Nile Red, which specifically labels sebum  
295 lipids.

296 **(D)** Quantification of sebaceous gland sizes in back skin sections from P56 (2<sup>nd</sup> telogen)  
297 mice that were either WT (K14 Cre-Prdm16<sup>fl/wt</sup>; left) or deficient for PRDM16 in the  
298 epidermis (K14-Cre-Prdm16<sup>fl/fl</sup>; right). Each dot represents a SG. For quantifications,  
299 four WT and four PRDM16 KO mice were used. The indicated p-value was calculated  
300 using an unpaired t-test (p=0.0007).

301 **(E)** Tail epidermal sheets (upper row) and back skin sections (bottom row) from P23 (1<sup>st</sup>  
302 telogen) mice that were either WT (K14 Cre-Prdm16<sup>fl/wt</sup>; left) or deficient for PRDM16 in  
303 the epidermis (K14-Cre-Prdm16<sup>fl/fl</sup>; right) were stained with Oil-Red-O.

304  
305  
306  
307  
308  
309  
310  
311  
312  
313  
314  
315  
316

317 mice were significantly larger than those of the control mice (Fig 3B-D; Fig3 – figure  
318 supplement 1A-B). Moreover, in the absence of PRDM16, the SGs seemed to produce  
319 an excess of sebum that accumulated in droplets surrounding the SGs (Fig 3B-C; Fig 3  
320 – figure supplement 1A-B). This increase in sebum production was also observed upon  
321 Oil Red O staining, which showed accumulation of lipids in the IFE and dermis of K14-  
322 *Cre-Prdm16<sup>fl/fl</sup>* mice (Fig 3E).

### 323 324 **PRDM16 prevents excessive proliferation of sebocytes within the sebaceous** 325 **gland**

326 To examine if the observed SG enlargement and elevated sebum production in K14-  
327 *Cre-Prdm16<sup>fl/fl</sup>* mice was due to an increased number of differentiated sebocytes, we  
328 analyzed the expression of SCD1 and Adipophilin (ADRP), two markers of mature  
329 sebocytes (Miyazaki et al., 2001; Eisinger et al., 1993; Ostler et al., 2010), in back skin  
330 sections of 1<sup>st</sup> and 2<sup>nd</sup> telogen mice (Fig 4A, Fig 4 – figure supplement 1). These  
331 stainings clearly showed that the number of differentiated lipid-producing sebocytes was  
332 higher in K14-*Cre-Prdm16<sup>fl/fl</sup>* mice compared with control ones (Fig. 4A, Fig 4 – figure  
333 supplement ). Next, to evaluate whether the elevated number of mature sebocytes in  
334 K14-*Cre-Prdm16<sup>fl/fl</sup>* mice could be caused by increased proliferation of JZ/SG SC and/or  
335 transiently amplifying sebocyte progenitors, we measured Ki67 expression levels.  
336 Remarkably, the loss of PRDM16 resulted in a dramatic increase in the number of  
337 proliferating cells within the JZ and the SG (Fig 4B-C). Moreover, while in control mice  
338 cell proliferation within the SG was restricted to the outer basal layer in K14-*Cre-*  
339 *Prdm16<sup>fl/fl</sup>* mice Ki67<sup>+</sup> cells were also abundant within the inner part of the SGs where  
340 sebum-producing sebocytes accumulate (Fig 4B). Co-staining of SCD1 and Ki67  
341 confirmed that, upon loss of PRDM16, differentiated sebocytes still proliferate (Fig 4D).  
342 These results suggest that sebocyte proliferation and differentiation, two processes that  
343 are uncoupled during normal SG homeostasis (Horsley et al., 2006; Feldman et al.,  
344 2019), can occur simultaneously upon loss of PRDM16. It has been previously reported  
345 that C-MYC overexpression leads to enlarged SGs and a concomitant increase in both  
346 proliferation and sebocyte differentiation (Arnold and Watt, 2001; Waikel et al., 2001;  
347 Jensen and Watt, 2006; Horsley et al., 2006; Cottle et al., 2013). Interestingly, C-MYC  
348 was significantly overexpressed in the SGs of the K14-*Cre-Prdm16<sup>fl/fl</sup>* mice (Fig 4E),

**Fig. 4****A**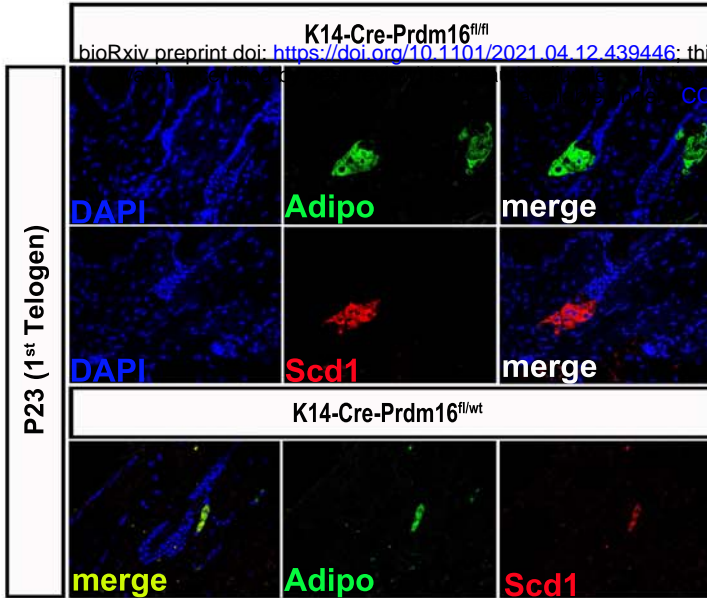**B**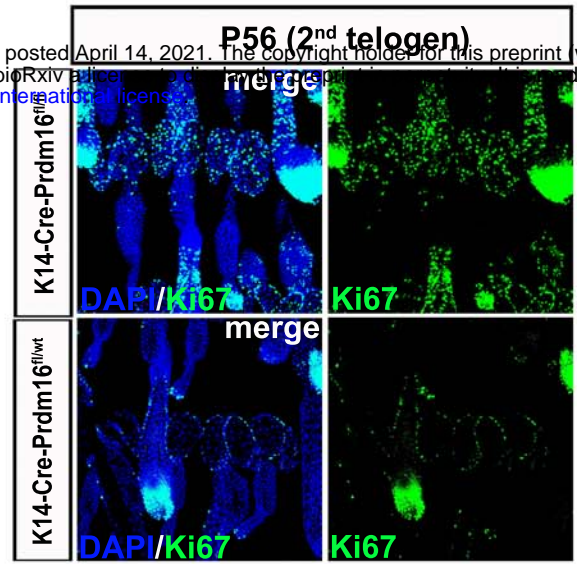**C**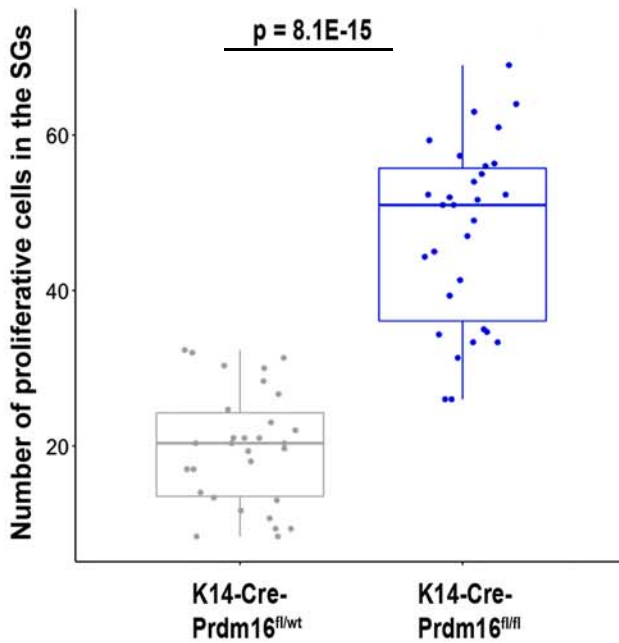**D**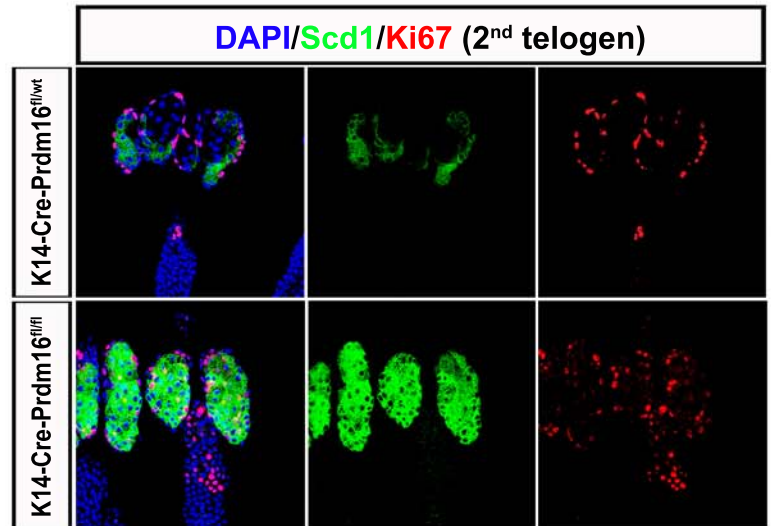**E**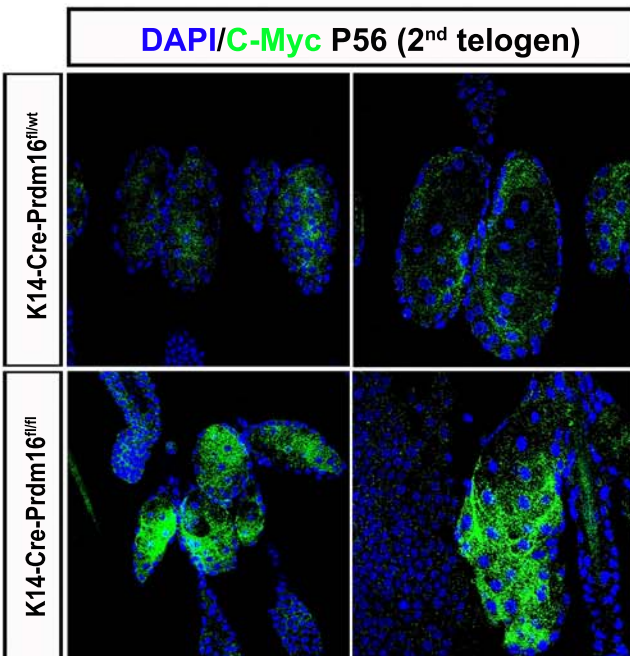

349 **Figure 4. PRDM16 coordinates sebocyte proliferation and differentiation within**  
350 **the sebaceous gland.**

351 **(A)** Expression of SCD1 and Adipophilin (Adipo), two specific markers of differentiated  
352 sebocytes, was analyzed in back skin sections from P23 (1st telogen) mice that were  
353 either WT (K14 Cre-Prdm16<sup>fl/wt</sup>; bottom) or deficient for PRDM16 in the epidermis (K14-  
354 Cre-Prdm16<sup>fl/fl</sup>; top).

355 **(B)** Expression of *Ki67*, a proliferation marker, specific was analyzed in back skin section  
356 from P56 (2<sup>nd</sup> telogen) mice that were either WT (K14 Cre-Prdm16<sup>fl/wt</sup>; bottom) or  
357 deficient for PRDM16 in the epidermis (K14-Cre-Prdm16<sup>fl/fl</sup>; top).

358 **(C)** Quantification of sebocyte proliferation was performed by counting the number of  
359 Ki67 positive cells within the SGs of P56 (2<sup>nd</sup> telogen) mice that were either WT (K14  
360 Cre-Prdm16<sup>fl/wt</sup>; bottom) or deficient for PRDM16 in the epidermis (K14-Cre-Prdm16<sup>fl/fl</sup>;  
361 top). Quantification was performed using three different Prdm16 KO mice and three  
362 different WT mice (60 sebaceous glands were obtained from each animal). The  
363 indicated p-value was calculated using an unpaired t-test.

364 **(D-E)** Immunofluorescence was performed to analysed the expression of Ki67 (a known  
365 proliferative marker), SCD1 and C-Myc (specific markers of differentiated and  
366 differentiating sebocytes respectively) in tail skin whole mount sections from P56 (2<sup>nd</sup>  
367 telogen) mice that were either WT (K14 Cre-Prdm16<sup>fl/wt</sup>; bottom) or deficient for  
368 PRDM16 in the epidermis (K14-Cre-Prdm16<sup>fl/fl</sup>; top).

369

370

371

372

373

374

375

376

377

378

379



380 suggesting that PRDM16 controls SG homeostasis, at least partly, by repressing *c-myc*  
381 expression. Altogether, our work shows that PRDM16 is necessary for SG homeostasis  
382 and suggests that this transcription factor controls the balance between sebocyte  
383 proliferation and differentiation.

384

## 385 **Discussion**

386 We previously described a simple approach whereby H3K27me3 and RNA-seq profiles  
387 can be combined to functionally dissect cellular heterogeneity in various developmental  
388 contexts (Rehimi et al., 2016). Here we expanded the applicability of our epigenomic  
389 approach and used it to identify major regulators of poorly characterized SC populations.  
390 The epidermis is a major example of an adult epithelial tissue displaying spatially  
391 confined SC heterogeneity, whereby various SC populations participate in skin  
392 homeostasis and regeneration upon injury (Jaks et al., 2010; Schepeler et al., 2014).  
393 However, with the exception of the bulge HFSC, the additional SC populations residing  
394 with the IFE and the pilosebaceous unit remain poorly characterized at the molecular  
395 level and their key cell-identity regulators are only partially known. When applied to the  
396 bulk of SC present in the HF and the SG, our approach successfully identified previously  
397 reported non-bulge SC regulators. Most importantly, we also predicted important  
398 regulatory roles for several genes with no previously described functions in the HF or the  
399 SG SCs. For four of these potential SC regulators (e.g., *Prdm16*, *GJB6*, *MSX1* and  
400 *DLK1*) we observed spatially restricted expression within non-bulge compartments of the  
401 pilosebaceous unit. Additional characterization of PRDM16, which was highly expressed  
402 in the JZ, uncovered a major role for this TF in SG homeostasis. Therefore, it is likely  
403 that many of the additional genes predicted as HF/SG regulators by our approach might  
404 play important functions in skin homeostasis and/or regeneration. More generally, our  
405 results indicate that our epigenomic approach can be a powerful tool to define the major  
406 cell identity regulators within adult stem cell populations, thus complementing current  
407 efforts to identify novel cell types both in the skin (Joost et al., 2016; Joost et al., 2018)  
408 as well as in other tissues using single-cell RNA-seq technology (e.g.  
409 <https://data.humancellatlas.org>).

410

411 *Prdm16* belongs to the PRDM family of TFs, whose members have major regulatory  
412 functions in several developmental and physiological contexts. Here we showed that  
413 *Prdm16*, which was previously described as a master regulator of brown fat cellular  
414 identity, plays an important role in SG homeostasis (Seale et al., 2008; Kajimura et al.,  
415 2010). Under homeostatic conditions, slow-cycling Lrig1+ SC located in basal layer of  
416 the JZ and the SG give rise to proliferative sebocyte progenitors (Kretzschmar et al.,  
417 2014; Page et al., 2013). As these progenitors are displaced towards the interior of the  
418 SG, they stop dividing, get fully differentiated and accumulate lipid droplets (Niemann  
419 and Horsley 2012). Although PRDM16 and LRIG1 display largely overlapping  
420 expression within the pilosebaceous unit, the loss of PRDM16 did not seem to affect the  
421 Lrig+ SC population residing within the JZ and SG basal layers. In contrast, in the  
422 absence of PRDM16, proliferation in the SG was no longer restricted to the basal layer  
423 but also frequently observed among lipid-producing sebocytes located in the SG interior.  
424 Consequently, *Prdm16*<sup>-/-</sup> mice displayed enlarged SGs and increased lipid production.  
425 Therefore, PRDM16 seems to be necessary to switch off proliferation in differentiating  
426 sebocytes. The regulatory networks that PRDM16 might control to ensure that  
427 proliferation ceases as sebocyte progenitors undergo terminal differentiation are still  
428 unknown. Nevertheless, the SG phenotypes observed in *Prdm16*<sup>-/-</sup> mice resemble those  
429 previously reported upon *Blimp1* deletion or *c-Myc* overexpression, respectively (Arnold  
430 and Watt, 2001; Horsley et al., 2006; Cottle et al., 2013; Kretzschmar et al., 2014).  
431 Furthermore, BLIMP1 and C-MYC negatively regulate each other expression in the SG  
432 (Horsley et al., 2006; Cottle et al., 2013; Kretzschmar et al., 2014). Therefore, we  
433 speculate that, once sebocyte progenitors start differentiating and producing sebum,  
434 PRDM16 might repress *c-Myc* and/or activate *Blimp1/Prdm1* in order to prevent their  
435 unrestricted proliferation. Further work will be required in order to identify the full  
436 repertoire of PRDM16 target genes during SG homeostasis.

437  
438 In addition to increased sebocyte proliferation, the conditional loss of PRDM16 in the  
439 mouse epidermis resulted in excessive sebum production and secretion, a major  
440 pathogenic factor in the development of acne vulgaris (Moradi Tuchayi et al., 2015;  
441 Picardo et al., 2017; Zouboulis et al., 2004). Acne vulgaris is the most common disease  
442 of the pilosebaceous unit, but its pathomechanisms remain incompletely understood. A

443 number of events are associated with the development of acne, which include not only  
444 increased sebum production, but also alterations in the quality of sebum lipids,  
445 inflammatory processes, dysregulation of the hormone microenvironment, interaction  
446 with neuropeptides, follicular hyperkeratinisation and the proliferation  
447 of propionibacterium acnes within the HF (Picardo et al., 2017; Moradi Tuchayi et al.,  
448 2015; Clayton et al., 2019). Interestingly, it was recently reported that GATA6, an  
449 important regulator of SG development and homeostasis (Oules et al., 2019; Oules et  
450 al., 2020), is downregulated in acne (Oules et al., 2020). Furthermore, GATA6 prevents  
451 hyperkeratinisation of the infundibulum and limits the lipid production and proliferation of  
452 sebocytes (Oules et al., 2020), which, as stated above, are two of the main pathological  
453 events associated with acne. We speculate that PRDM16 might constrain sebum  
454 production by activating *Gata6* in sebocyte progenitors. Therefore, analogously to  
455 GATA6 (Oules et al., 2020), PRDM16 might represent a relevant target for the future  
456 treatment of acne. However, additional work is still needed in order to identify the  
457 signalling pathways that control PRDM16 expression in the JZ and the SG and that  
458 could be therapeutically targeted in acne.

459

## 460 **Materials and Methods**

461

### 462 **K14-Cre-Prdm16<sup>fl/fl</sup> Mice**

463 *Prdm16*<sup>lox/lox</sup> mutant mice with loxP sites flanking exon 9 of the *Prdm16* gene were  
464 ordered from Jackson lab (Stock No: 032160). To generate skin-specific Prdm16 knock-  
465 out mice, female *Prdm16*<sup>fllox/fllox</sup> mice were crossed with *Keratin-14 Cre* mice (K14-Cre;  
466 mixed Swiss Webster; C57Bl/6J; CBA/J; The Jackson Laboratory, Bar Harbor, ME) ,  
467 followed by backcrossing onto the C57Bl/6J background to generate compound  
468 heterozygous (*Prdm16*<sup>fllox/+;Cre/+</sup>) mice. Male heterozygous *Prdm16*<sup>fllox/+;Cre/+</sup> mice were  
469 subsequently mated with female *Prdm16*<sup>fllox/fllox</sup> (Lox) mice, generating  
470 *Prdm16*<sup>fllox/fllox;Cre/+</sup> mice. For litter expansion, male *Prdm16*<sup>fllox/fllox;Cre/+</sup> mice were bred with  
471 female Lox mice. All mice were on a fully backcrossed C57Bl/6J background, and Lox  
472 and *Prdm16*<sup>fllox/fllox;Cre/+</sup> mice were born in an expected ratio of 1:1. Genotyping was  
473 performed by PCR using genomic DNA isolated from a tail or ear clip, as described  
474 previously. The primers used for PCR were as follows. For K14 Cre genotyping, the

475 forward primer: GTCCAATTTACTGACCGTACA and reverse primer:  
476 CTGTCACTTGGTCGTGGCAGC were used. For *Prdm16* flox genotyping, the mutant-  
477 specific forward primer: AGG AAC TTC ATC AGT CAG GTA CA, common reverse  
478 primer: TGC AGG GAG ATT GAC AAG TG and the WT-specific forward primer: ACC  
479 TTG AGG TTC TCG GTT AGA C was used (Cohen et al., 2014). Mice were maintained  
480 on a 12-h light/dark cycle with free access to water and either a standard chow diet  
481 (Purina 5008). Animals were housed and maintained according to FELASA guidelines in  
482 the animal facility of Centre for Pharmacology and Centre of Molecular Medicine  
483 Cologne, Cologne, Germany. All experiments were approved by local authorities. All  
484 animals were sacrificed by cervical dislocation and tissues (back skin and tail skin) were  
485 rapidly removed, either snap-frozen in liquid nitrogen or fixed in 4% PFA/1 x PBS and  
486 stored at -20 or -80 °C accordingly. All *in vivo* experimental procedures were approved  
487 by the Animal Care Research Committee of the University of Cologne (Germany).

488  
489 **PSU SC isolation**  
490 Alpha6<sup>+</sup>/Sca1<sup>-</sup> cells were isolated from back skin of P56 mice (2<sup>nd</sup> telogen) by incubating  
491 skin pieces in 0.8% trypsin (Gibco) for 50 min at 37°C. After separating the epidermis  
492 from the underlying dermis, cells were passed through 70 µm and 45 µm cell strainers  
493 (BD Biosciences) and pelleted at 900 rpm for 7 minutes at 4 °C. Cells were resuspended  
494 in 250µl of FACS buffer (1 x PBS, 2.5% FBS or BSA and 2mM EDTA), afterward Alpha  
495 6 conjugated antibody was added in each tube at concentration of 1:100. After vortex,  
496 samples were incubated at 4°C for 1 hr in the dark. The cells were washed twice with  
497 1ml of FACS buffer and centrifuge at 900 rpm for 5 minutes at 4 °C. Cells were  
498 resuspended in FACS buffer. Cells were analysed in a BD FACS Canto II or sorted in  
499 either a BD FACSAria II or a BD FACSAria Fusion. Data were analysed using FlowJo  
500 software version 10. Expression of cell surface markers was analysed on live cells after  
501 exclusion of cell doublets and dead cells using 7AAD 1: 100 (eBioscience) or Fixable  
502 Viability Dye eFluor506 (eBioscience). The following antibody was used FITC-a6 Integrin  
503 (clone GoH3, eBioscience).

504  
505 **ChIP-Seq**

506 For each ChIP-seq experiment, 500,000 Alpha6<sup>+</sup>/Sca1<sup>-</sup> cells isolated from back skin of  
507 P56 mice (2<sup>nd</sup> telogen) were used. Alpha6<sup>+</sup>/Sca1<sup>-</sup> cells were briefly homogenized in  
508 DMEM media with 10% FBS serum/1M sodium butyrate and cross-linked with 1%  
509 formaldehyde at room temperature with rotation for 15 min. Cross-linking was quenched  
510 with 0.125 M glycine, and HFSC were rinsed with cold 1 X PBS, re-suspended in 500 µl  
511 of sonication buffer (10 mM Tris, 100 mM NaCl, 1 mM EDTA, 0.5 mM EGTA, 0.1% Na-  
512 deoxycholate, and 0.5% N-lauroylsarcosine) with 1% SDS, and incubated at 4C for 10  
513 min. Chromatin was sonicated to generate DNA fragments of 200–500 bp. Sonicated  
514 chromatin was incubated overnight with 5 µg of antibodies against H3K27me3 (39536;  
515 Active Motif) or H3K4me3 (39159; Active Motif; Rada-Iglesias et al., 2011; Rehimy et al.,  
516 2016), followed by 4–6 hr incubation with Protein G Dynabeads (Life Technologies).  
517 Beads were washed four times with 1 mL of cold radioimmunoprecipitation assay buffer  
518 (RIPA) washing buffer (50 mM HEPES, 500 mM LiCl, 1 mM EDTA, 1% NP-40 and 0.7%  
519 Na-deoxycholate) and once with Tris/EDTA buffer (TE) containing 50mM NaCl.  
520 Immunoprecipitated chromatin was eluted from the beads by adding elution buffer (50  
521 mM Tris, 10 mM EDTA, and 1% SDS) and vortexing at 65C for 15 min. Crosslinking was  
522 reversed by incubating the eluted samples at 65C overnight. Samples were then diluted  
523 (1:1) with TE and sequentially treated with RNase A (0.2mg/mL) and proteinase K  
524 (0.2mg/mL). DNA was purified using phenol:chloroform, followed by ethanol  
525 precipitation, and re-suspended in water. DNA libraries from H3K27me3 ChIP,  
526 H3K4me3 ChIP, and corresponding input DNA samples were generated with the TruSeq  
527 kit (Illumina) as single reads. Sequences were mapped with Burrows-Wheeler Aligner  
528 (BWA) (Li and Durbin 2009) to the mouse mm10 genome assembly. The resulting  
529 Binary Alignment/Map (BAM) files for the H3K27me3 ChIP-seq data were analyzed with  
530 MACS (Zhang et al., 2008) using the following settings: `–broad–gsize 8e8 -q 0.1 -m 5`  
531 `50–fix-bimodal–ext sizes` (Zhang et al., 2008). Among the identified peaks, only those  
532 with fold-enrichments  $\geq 3$  were considered for downstream analyses. Finally, peaks  
533 located  $\leq 2$  kb from each other was clustered into single genomic intervals using Galaxy  
534 tools. The generated ChIP-seq datasets in Alpha6<sup>+</sup>/Sca1<sup>-</sup> cells are accessible through  
535 GEO: ([GSE169647](#)).

536

537 **RNA-Seq**

538 Approximately  $\sim 10^5$  Alpha6<sup>+</sup>/Sca1<sup>-</sup> cells from back skin of P56 mice (2<sup>nd</sup> telogen) were  
539 isolated and collected in 1.5 ml Eppendorf from 56 days old mice (P56: 2nd telogen).  
540 Accumulated cells were used to isolate total RNA using the RNeasy Plus Micro Kit after  
541 which the RNA quality was determined using an Agilent 2200 Tape Station. Libraries  
542 were prepared and sequenced as previously described as three independent biological  
543 replicates (Rehimi et al., 2016). The generated RNA-seq datasets in Alpha6<sup>+</sup>/Sca1<sup>-</sup> cells  
544 are accessible through GEO: ([GSE169648](#)).

545  
546 RNA-seq data from bulge HFSC was previously generated as three biological replicates  
547 (Chacon-Martinez et al., 2017) and was retrieved from GEO (GSE76779).

548

### 549 **Differential Functional Heterogeneity (dFH) Score**

550 The dFH score was computed as follows:

$$551 \mathbf{dFH}_g = (H3K27me3B_g + 1) \times \log_2(DE_g\_FoldChange) \times -\log(DE_g\_qValue)$$

- 552 •  $H3K27me3B_g$  is the breadth of the H2K27me3 mark in Alpha6<sup>+</sup>/Sca1<sup>-</sup> cells at the gene  
553  $g$ . We added 1 to the H3K27me3 breadth to avoid mathematical issues with zeros.
- 554 •  $\log_2(DE_g\_FoldChange)$  is the  $\log_2$  gene expression fold-change of the gene  $g$   
555 calculated through differential gene expression comparing Alpha6<sup>+</sup>/Sca1<sup>-</sup> cells against  
556 bulge HFSC using DESeq2 (Love et al., 2014).
- 557 •  $-\log(DE_g\_qValue)$  represents the significance of the differential expression (measured  
558 as  $-\log(q\text{-value})$ ) of the gene  $g$  when comparing Alpha6<sup>+</sup>/Sca1<sup>-</sup> cells against bulge  
559 HFSC using DESeq2 (Love et al., 2014).

560

561 All mouse genes and their corresponding dFH scores are listed in Data S1.

562

### 563 **Haematoxylin and Eosin (H&E) staining**

564 Fresh back skin samples from similar sites obtained from age and gender-matched  
565 control and *Prdm16* Knockout mice were fixed in 4% PFA/PBS at RT for 30 minutes.  
566 Subsequently, back skin samples were paraffin-embedded for sectioning (8 $\mu$ m thick)  
567 and stained with hematoxylin (Sigma) at RT for 3 minutes. Counterstaining was  
568 achieved by rinsing with eosin (Sigma) for 30 seconds, followed by dehydration through

569 sequential washing with 95% ethanol and 100% ethanol. Slides were mounted with  
570 Aqua Poly/Mount (18606-20, Polysciences, Inc).

571

### 572 **Oil Red O Staining**

573 Back skin sections between 7 and 12  $\mu\text{m}$  thick were cut on a cryostat (LEICA CM  
574 3050S) and attached to Super Frost Plus slides (Menzel-Glaser; Thermo Scientific), air  
575 dried for up to 90 minutes at room temperature (RT), and then stained with Oil Red O  
576 dye (O0625-25G, Sigma) to detect the presence of lipids. Cryo-sections and tail skin  
577 whole mounts were washed three times in PBS and fixed in 4% Paraformaldehyde  
578 (Sigma) in PBS for 30 mins at RT. Next, samples were incubated for 10 minutes in 60%  
579 isopropanol (Sigma) and then stained for 30 minutes with Oil Red O solution. Samples  
580 were then briefly rinsed in 60% isopropanol, washed thoroughly in water, counterstained  
581 in Mayers Hematoxylin solution (Fluka) and mounted under coverslips in Aqua  
582 Poly/Mount (18606-20, Polysciences, Inc).

583

### 584 **Nile Red staining**

585 Fresh tail whole mounts samples from similar sites obtained in age and gender-matched  
586 control and *Prdm16* Knockout mice were fixed in 4% PFA/PBS for 30 minutes at RT.  
587 Samples were washed once in PBS for 10 minutes at RT. Next, samples were incubated  
588 in 1 $\mu\text{l}$  Nile Red (N3013, Sigma)/1ml PBS for 30 minutes at RT and nuclei were stained  
589 with DAPI (Sigma) at RT for 15 minutes. Slides were mounted with Aqua Poly/Mount  
590 (18606-20, Polysciences, Inc).

591

### 592 **Immunofluorescence and immunohistochemistry**

593 Tissue samples were fixed in 4% Paraformaldehyde/PBS for 1hr at RT, dehydrated, and  
594 embedded for cryo- and paraffin-sections. Sections (7-12 $\mu\text{m}$ ) were deparaffinized,  
595 rehydrated, permeabilized in 0.5% Triton X-100/1xPBS for 10 minutes and blocked with  
596 2% BSA/PBS/0.5% Triton X-100 for 30 minutes at RT. Sections were stained with  
597 primary antibodies in 0.5% Triton X-100, 1% BSA, PBS overnight at 4C. Secondary,  
598 fluorescent antibodies were used to detect primary antibody binding, and nuclei were  
599 visualized with DAPI. Slides were mounted with Aqua Poly/Mount (18606-20,  
600 Polysciences, Inc). The following primary antibodies were used: PRDM16 (PA520872,

601 Thermo Fisher Scientific), MSX1 (ab174207, Abcam), DLK1 (3A10, Thermo Fisher  
602 Scientific), GJB6 (ab200866, Abcam), SCD1 (SC14719, Santa Cruz Biotechnology),  
603 LRIG1 (AF3688, R&D systems) and Adipophilin (20R-AP002, Fitzgerald Industries  
604 International). Secondary antibodies (anti-mouse AlexaFluor 488 and anti-rabbit Alexa  
605 Fluor 568) were purchased from Life Technologies.

606

### 607 **Imaging and Fiji (Image J) Analysis of Skin Samples**

608 Imaging of immunofluorescence and histological stainings were performed on Olympus  
609 BX 53 or Olympus Fluoview FV 1000 with their corresponding softwares, respectively.  
610 To quantifying the number of proliferative cells or the size of the SGs in *Prdm16*  
611 knockout and WT mice, images of tail whole mounts obtained as described above were  
612 analyzed using Fiji (ImageJ-win32) software. The *cell count* function in plugins was used  
613 to count the proliferative cells and the *free hand* function in toolbar was used to draw the  
614 outlines around the regions of interest. After this, the total numbers of proliferative cells  
615 were counted and the size of SGs was measured per square micrometer ( $\mu\text{m}^2$ ).

616

### 617 **References**

618

619 Alcolea MP, Jones PH. 2014. Lineage analysis of epidermal stem cells. *Cold Spring*  
620 *Harb Perspect Med* **4**:a015206.

621

622 Arnold I, Watt FM. 2001. c-Myc activation in transgenic mouse epidermis results in  
623 mobilization of stem cells and differentiation of their progeny. *Curr Biol* **11**:558–568.

624

625 Blanpain C, Fuchs E. 2009. Epidermal homeostasis: a balancing act of stem cells in the  
626 skin. *Nat Rev Mol Cell Biol* **10**:207–217.

627

628 Blanpain C, Lowry WE, Geoghegan A, Polak L, Fuchs E. 2004. Self-renewal,  
629 multipotency, and the existence of two cell populations within an epithelial stem cell  
630 niche. *Cell* **118**:635–648.

631

632 Brogden NK, Mehalick L, Fischer CL, Wertz PW, Brogden KA. 2012. The emerging role  
633 of peptides and lipids as antimicrobial epidermal barriers and modulators of local  
634 inflammation. *Skin Pharmacol Physiol* **25**:167–181.

635

636 Chuong C-M. 2007. Regenerative biology: new hair from healing wounds. *Nature*.

637

638 Clayton RW, Göbel K, Niessen CM, Paus R, van Steensel MAM, Lim X. 2019.  
639 Homeostasis of the sebaceous gland and mechanisms of acne pathogenesis. *Br J*



640 *Dermatol* **181**:677–690.

641  
642 Cottle DL, Kretzschmar K, Schweiger PJ, Quist SR, Gollnick HP, Natsuga K, Aoyagi S,  
643 Watt FM. 2013. c-MYC-induced sebaceous gland differentiation is controlled by an  
644 androgen receptor/p53 axis. *Cell Rep* **3**:427–441.

645  
646 Donati G, Rognoni E, Hiratsuka T, Liakath-Ali K, Hoste E, Kar G, Kayikci M, Russell R,  
647 Kretzschmar K, Mulder KW, Teichmann SA, Watt FM. 2017. Wounding induces  
648 dedifferentiation of epidermal Gata6 cells and acquisition of stem cell properties. *Nat*  
649 *Cell Biol* **19**:603–613. Donati G, Watt FM. 2015. Stem cell heterogeneity and plasticity in  
650 epithelia. *Cell Stem Cell* **16**:465–476.

651  
652 Drake DR, Brogden KA, Dawson DV, Wertz PW. 2008. Thematic review series: skin  
653 lipids. Antimicrobial lipids at the skin surface. *J Lipid Res* **49**:4–11.

654  
655 Eisinger DP, Serrero G. 1993. Structure of the gene encoding mouse adipose  
656 differentiation-related protein (ADRP). *Genomics* **16**:638–644.

657  
658 Feldman A, Mukha D, Maor Il, Sedov E, Koren E, Yosefzon Y, Shlomi T, Fuchs Y. 2019.  
659 Blimp1 cells generate functional mouse sebaceous gland organoids in vitro. *Nat*  
660 *Commun* **10**:2348.

661  
662 Fischer CL, Blanchette DR, Brogden KA, Dawson DV, Drake DR, Hill JR, Wertz PW.  
663 2014. The roles of cutaneous lipids in host defense. *Biochim Biophys Acta* **1841**:319–  
664 322.

665  
666 Fluhr JW, Mao-Qiang M, Brown BE, Wertz PW, Crumrine D, Sundberg JP, Feingold KR,  
667 Elias PM. 2003. Glycerol regulates stratum corneum hydration in sebaceous gland  
668 deficient (asebia) mice. *J Invest Dermatol* **120**:728–737.

669  
670 Fog CK, Galli GG, Lund AH. 2012. PRDM proteins: important players in differentiation  
671 and disease. *Bioessays* **34**:50–60.

672  
673 Frances D, Niemann C. 2012. Stem cell dynamics in sebaceous gland morphogenesis in  
674 mouse skin. *Dev Biol* **363**:138–146.

675  
676 Fuchs E, Tumber T, Guasch G. 2004. Socializing with the neighbors: stem cells and  
677 their niche. *Cell* **116**:769–778.

678  
679 Hohenauer T, Moore AW. 2012. The Prdm family: expanding roles in stem cells and  
680 development. *Development* **139**:2267–2282.

681  
682 Horsley V, O'Carroll D, Tooze R, Ohinata Y, Saitou M, Obukhanych T, Nussenzweig M,  
683 Tarakhovskiy A, Fuchs E. 2006. Blimp1 defines a progenitor population that governs  
684 cellular input to the sebaceous gland. *Cell* **126**:597–609.

685  
686 Ito M, Liu Y, Yang Z, Nguyen J, Liang F, Morris RJ, Cotsarelis G. 2005. Stem cells in the

- 687 hair follicle bulge contribute to wound repair but not to homeostasis of the epidermis. *Nat*  
688 *Med* **11**:1351–1354.
- 689  
690 Jaks V, Kasper M, Toftgård R. 2010. The hair follicle—a stem cell zoo. *Exp Cell Res*  
691 **316**:1422–1428.
- 692  
693 Jensen KB, Collins CA, Nascimento E, Tan DW, Frye M, Itami S, Watt FM. 2009. Lrig1  
694 expression defines a distinct multipotent stem cell population in mammalian epidermis.  
695 *Cell Stem Cell* **4**:427–439.
- 696  
697 Jensen KB, Watt FM. 2006. Single-cell expression profiling of human epidermal stem  
698 and transit-amplifying cells: Lrig1 is a regulator of stem cell quiescence. *Proc Natl Acad*  
699 *Sci U S A* **103**:11958–11963.
- 700  
701 Joost S, Jacob T, Sun X, Annusver K, La Manno G, Sur I, Kasper M. 2018. Single-Cell  
702 Transcriptomics of Traced Epidermal and Hair Follicle Stem Cells Reveals Rapid  
703 Adaptations during Wound Healing. *Cell Rep* **25**:585–597.e7.
- 704  
705 Joost S, Zeisel A, Jacob T, Sun X, La Manno G, Lönnerberg P, Linnarsson S, Kasper M.  
706 2016. Single-Cell Transcriptomics Reveals that Differentiation and Spatial Signatures  
707 Shape Epidermal and Hair Follicle Heterogeneity. *Cell Syst* **3**:221–237.e9.
- 708  
709 Kajimura S, Seale P, Kubota K, Lunsford E, Frangioni JV, Gygi SP, Spiegelman BM.  
710 2009. Initiation of myoblast to brown fat switch by a PRDM16-C/EBP-beta transcriptional  
711 complex. *Nature* **460**:1154–1158.
- 712  
713 Kajimura S, Seale P, Spiegelman BM. 2010. Transcriptional control of brown fat  
714 development. *Cell Metab* **11**:257–262.
- 715  
716 Kretschmar K, Cottle DL, Donati G, Chiang M-F, Quist SR, Gollnick HP, Natsuga K, Lin  
717 K-I, Watt FM. 2014. BLIMP1 is required for postnatal epidermal homeostasis but does  
718 not define a sebaceous gland progenitor under steady-state conditions. *Stem Cell*  
719 *Reports* **3**:620–633.
- 720  
721 Love MI, Huber W, Anders S. 2014. Moderated estimation of fold change and dispersion  
722 for RNA-seq data with DESeq2. *Genome Biol* **15**:550.
- 723  
724 Miyazaki M, Man WC, Ntambi JM. 2001. Targeted disruption of stearyl-CoA  
725 desaturase1 gene in mice causes atrophy of sebaceous and meibomian glands and  
726 depletion of wax esters in the eyelid. *J Nutr* **131**:2260–2268.
- 727  
728 Moradi Tuchayi S, Makrantonaki E, Ganceviciene R, Dessinioti C, Feldman SR,  
729 Zouboulis CC. 2015. Acne vulgaris. *Nat Rev Dis Primers* **1**:15029.
- 730  
731 Morrison SJ, Spradling AC. 2008. Stem cells and niches: mechanisms that promote  
732 stem cell maintenance throughout life. *Cell* **132**:598–611.
- 733

- 734 Morris RJ, Liu Y, Marles L, Yang Z, Trempus C, Li S, Lin JS, Sawicki JA, Cotsarelis G.  
735 2004. Capturing and profiling adult hair follicle stem cells. *Nat Biotechnol* **22**:411–417.  
736
- 737 Niemann C, Horsley V. 2012. Development and homeostasis of the sebaceous gland.  
738 *Semin Cell Dev Biol* **23**:928–936.  
739
- 740 Ostler DA, Prieto VG, Reed JA, Deavers MT, Lazar AJ, Ivan D. 2010. Adipophilin  
741 expression in sebaceous tumors and other cutaneous lesions with clear cell histology:  
742 an immunohistochemical study of 117 cases. *Mod Pathol* **23**:567–573.  
743
- 744 Oulès B, Philippeos C, Segal J, Tihy M, Vietri Rudan M, Cujba A-M, Grange PA, Quist  
745 S, Natsuga K, Deschamps L, Dupin N, Donati G, Watt FM. 2020. Contribution of GATA6  
746 to homeostasis of the human upper pilosebaceous unit and acne pathogenesis. *Nat*  
747 *Commun* **11**:5067.  
748
- 749 Oulès B, Rognoni E, Hoste E, Goss G, Fiehler R, Natsuga K, Quist S, Mentink R, Donati  
750 G, Watt FM. 2019. Mutant Lef1 controls Gata6 in sebaceous gland development and  
751 cancer. *EMBO J* **38**. doi:10.15252/embj.2018100526  
752
- 753 Page ME, Lombard P, Ng F, Göttgens B, Jensen KB. 2013. The epidermis comprises  
754 autonomous compartments maintained by distinct stem cell populations. *Cell Stem Cell*  
755 **13**:471–482.  
756
- 757 Picardo M, Eichenfield LF, Tan J. 2017. Acne and Rosacea. *Dermatol Ther* **7**:43–52.  
758
- 759 Rehim R, Nikolic M, Cruz-Molina S, Tebartz C, Frommolt P, Mahabir E, Clément-Ziza  
760 M, Rada-Iglesias A. 2016. Epigenomics-Based Identification of Major Cell Identity  
761 Regulators within Heterogeneous Cell Populations. *Cell Rep* **17**:3062–3076.  
762
- 763 Schepeler T, Page ME, Jensen KB. 2014. Heterogeneity and plasticity of epidermal  
764 stem cells. *Development* **141**:2559–2567.  
765
- 766 Schertel C, Albarca M, Rockel-Bauer C, Kelley NW, Bischof J, Hens K, van Nimwegen  
767 E, Basler K, Deplancke B. 2015. A large-scale, in vivo transcription factor screen defines  
768 bivalent chromatin as a key property of regulatory factors mediating *Drosophila* wing  
769 development. *Genome Res* **25**:514–523.  
770
- 771 Schneider MR, Paus R. 2010. Sebocytes, multifaceted epithelial cells: lipid production  
772 and holocrine secretion. *Int J Biochem Cell Biol* **42**:181–185.  
773
- 774 Seale P, Bjork B, Yang W, Kajimura S, Chin S, Kuang S, Scimè A, Devarakonda S,  
775 Conroe HM, Erdjument-Bromage H, Tempst P, Rudnicki MA, Beier DR, Spiegelman BM.  
776 2008. PRDM16 controls a brown fat/skeletal muscle switch. *Nature* **454**:961–967.  
777
- 778 Shamloul G, Khachemoune A. 2021. An updated review of the sebaceous gland and its  
779 role in health and diseases Part 1: Embryology, evolution, structure, and function of  
780 sebaceous glands. *Dermatol Ther* **34**:e14695.

- 781  
782 Shim WJ, Sinniah E, Xu J, Vitrinel B, Alexanian M, Andreoletti G, Shen S, Sun Y,  
783 Balderson B, Boix C, Peng G, Jing N, Wang Y, Kellis M, Tam PPL, Smith A, Piper M,  
784 Christiaen L, Nguyen Q, Bodén M, Palpant NJ. 2020. Conserved Epigenetic Regulatory  
785 Logic Infers Genes Governing Cell Identity. *Cell Syst* **11**:625–639.e13.
- 786  
787 Shirokova V, Biggs LC, Jussila M, Ohyama T, Groves AK, Mikkola ML. 2016. Foxi3  
788 Deficiency Compromises Hair Follicle Stem Cell Specification and Activation. *Stem Cells*  
789 **34**:1896–1908.
- 790  
791 Thody AJ, Shuster S. 1989. Control and function of sebaceous glands. *Physiol Rev*  
792 **69**:383–416.
- 793  
794 Wang AB, Zhang YV, Tumber T. 2017. Gata6 promotes hair follicle progenitor cell  
795 renewal by genome maintenance during proliferation. *EMBO J* **36**:61–78.
- 796  
797 Watt FM, Hogan BL. 2000. Out of Eden: stem cells and their niches. *Science* **287**:1427–  
798 1430.
- 799  
800 Waikel RL, Kawachi Y, Waikel PA, Wang XJ, Roop DR. 2001. Deregulated expression  
801 of c-Myc depletes epidermal stem cells. *Nat Genet* **28**:165–168.
- 802  
803 Zouboulis CC, Katsambas AD, Kligman AM. 2014. Pathogenesis and Treatment of Acne  
804 and Rosacea. Springer.

**Figure 1 - figure supplement 1**

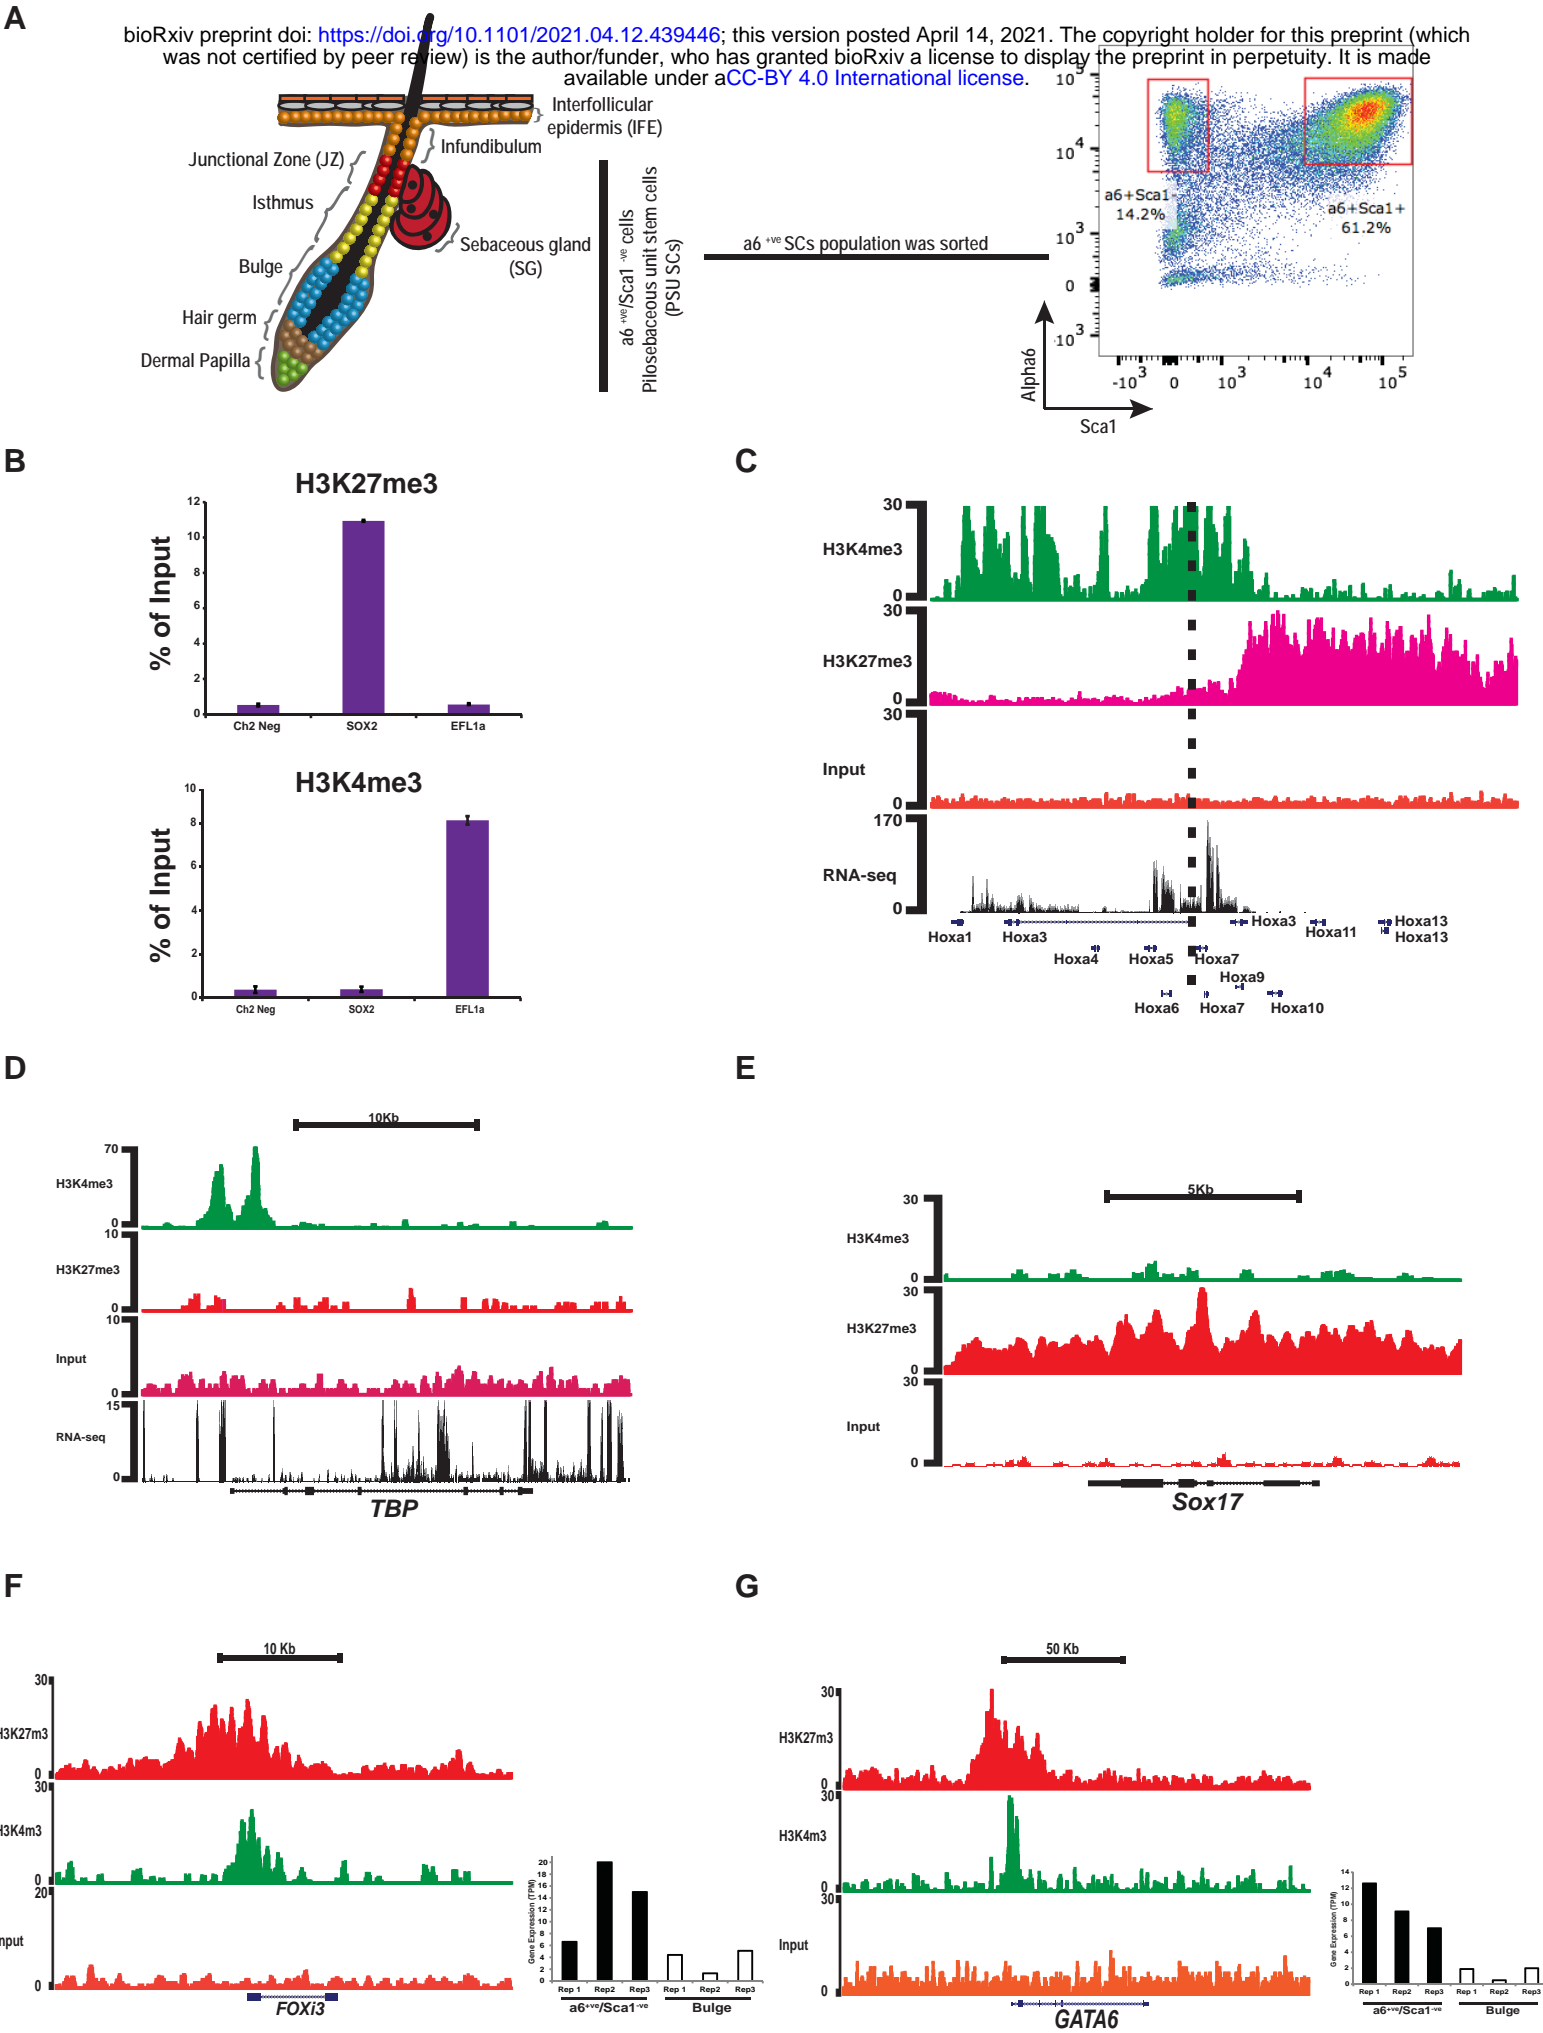

## **Figure 1 – figure supplement 1. Epigenomic analysis of sorted epidermal stem cells.**

**(A)** Left: Schematic diagram showing different epidermal compartments and the location of  $\alpha 6^{+ve}/Sca1^{-ve}$  PSU SC. Right: representative FACS plot of freshly isolated epidermal cells stained with the indicated antibodies. The  $\alpha 6^{+ve}/Sca1^{-ve}$  and  $\alpha 6^{+ve}/Sca1^{+ve}$  populations are highlighted.

**(B)** H3K27me3 and H3K4me3 levels at the indicated regions were measured by ChIP-qPCR analysis using  $\alpha 6^{+ve}/Sca1^{-ve}$  cells isolated from P56 adult mice skin. Chr2 Neg corresponds to an intergenic region in mice chromosome 2 and serves as a H3K27me3 negative control; the promoter of *Sox2*, which is inactive in  $\alpha 6^{+ve}/Sca1^{-ve}$  HFSC, is expected to be marked by H3K27me3 but not H3K4me3; the promoter of *Eef1a*, a housekeeping gene active in  $\alpha 6^{+ve}/Sca1^{-ve}$  PSU SC, is expected to be marked by H3K4me3 but not by H3K27me3.

**(C)** ChIP-seq (H3K4me3 and H3K27me3) and RNA seq profiles generated from  $\alpha 6^{+ve}/Sca1^{-ve}$  stem cells around the HOX locus. The HOXA cluster can be clearly divided in active (high RNA-seq and high H3K4me3 levels) and inactive (low RNA-seq and high H3K27me3) domains, which illustrates the quality of the ChIP-seq data generated from sorted  $\alpha 6^{+ve}/Sca1^{-ve}$  PSU SC.

**(D-E)** ChIP-seq and RNA-seq profiles from sorted  $\alpha 6^{+ve}/Sca1^{-ve}$  PSU SC around a housekeeping gene (*Tbp*) and a developmental gene not expressed in the epidermis (*Sox17*).

**(F and G)** ChIP-seq (H3K27me3 in red, H3K4me3 in green and input in orange) profiles and RNA-seq values (bar plots) are shown for *Gata6* and *Foxi3*, two genes recently described as non-bulge SC regulators (Wang et al., 2017; Shirokova et al., 2016; Donati et al., 2017).

# Figure 2 - figure supplement 1

**A**

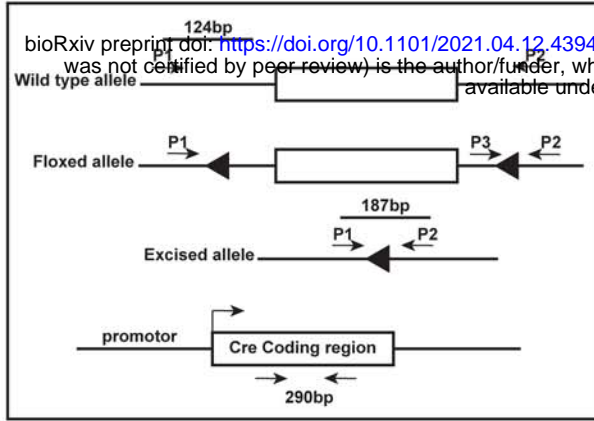

Elimination of Prdm16 by Cre-lox recombination

**B**

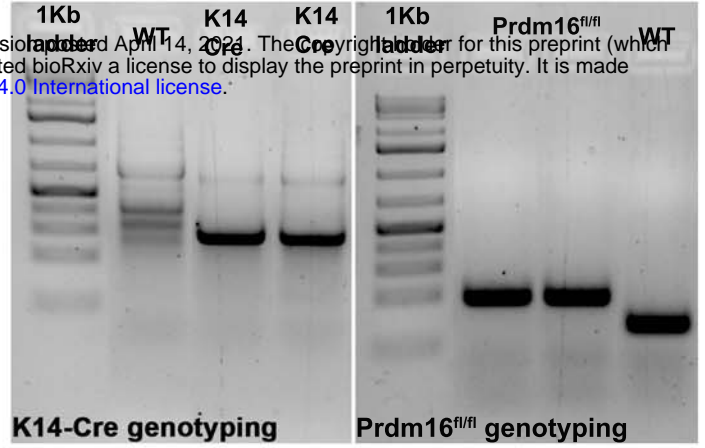

K14-Cre genotyping

Prdm16<sup>fl/fl</sup> genotyping

**C**

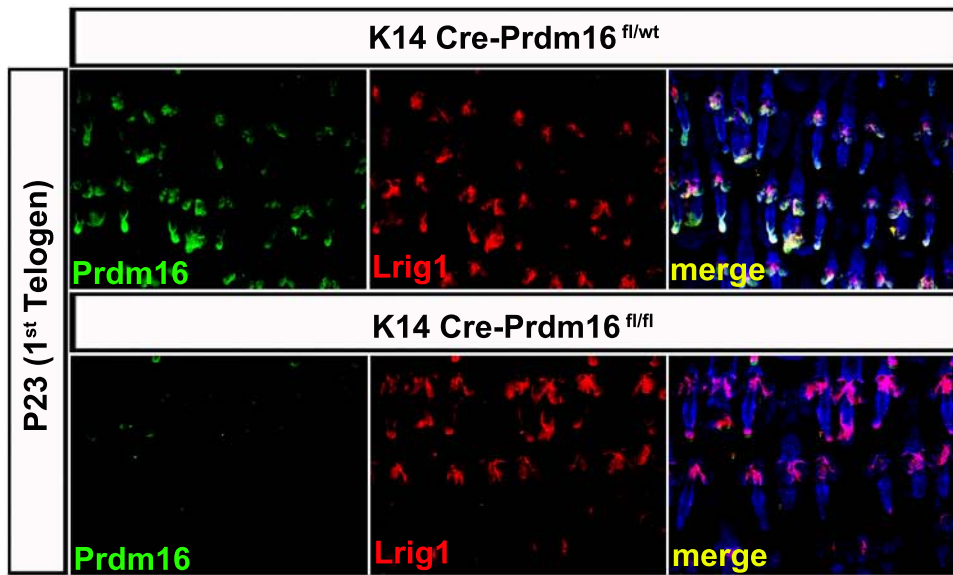

**Figure 2- figure supplement 1. Epidermal-specific *Prdm16* Knock-out mouse model.**

**(A)** Schematic diagram of the PCR strategy used to confirm conditional loss of *Prdm16* in the  $\text{Alpha6}^+/\text{Sca1}^-$  PSU SC. Three primers P1 (Mutant-specific forward), P2 (Wild type-specific forward) and P3 (Common) were used to amplify exon 9 of the *Prdm16* gene.

**(B)** PCR analysis of DNA from 21 days old K-Cre-*Prdm16*<sup>flox/flox</sup> mouse isolated from tail biopsy confirmed the deletion of *Prdm16* gene in K14-Cre mice.

**(C)** Double immunofluorescence for PRDM16 and LRIG1 in back skin sections from P23 (1<sup>st</sup> telogen) mice that were either WT (K14 Cre-*Prdm16*<sup>fl/wt</sup>; upper row) or deficient for PRDM16 in the epidermis (K14-Cre-*Prdm16*<sup>fl/fl</sup>).



**A**

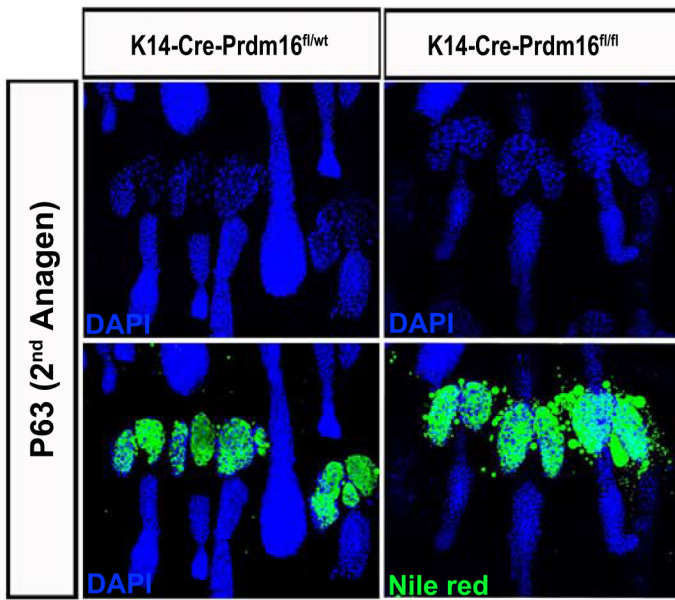

**B**

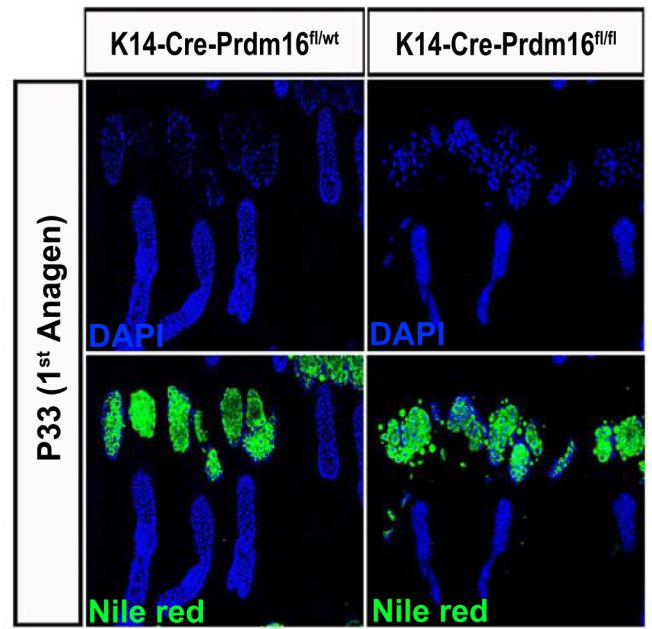

**Figure 3 – figure supplement 1. PRDM16 deficient mice display enlarged sebaceous glands and increased sebum production.**

**(A-B)** Back skin sections from (A) P63 (2<sup>nd</sup> anagen) and (B) P33 (1<sup>st</sup> anagen) mice that were either WT (K14 Cre-Prdm16<sup>fl/wt</sup>; left) or deficient for PRDM16 in the epidermis (K14-Cre-Prdm16<sup>fl/fl</sup>; right) were stained with Nile Red.

**Figure 4 - figure supplement 1**

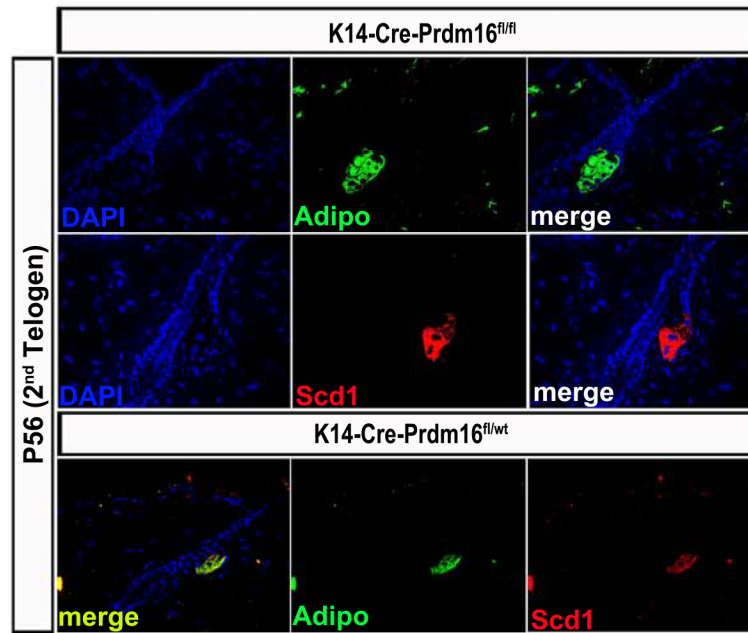

**Figure 4 – figure supplement 1. PRDM16 deficient mice display higher number of differentiated lipid-producing sebocytes.** Expression of SCD1 and Adipophilin (Adipo), two specific markers of differentiated sebocytes, was analyzed in back skin sections from P23 (1st telogen) mice that were either WT (K14 Cre-Prdm16<sup>fl/wt</sup>; bottom) or deficient for PRDM16 in the epidermis (K14-Cre-Prdm16<sup>fl/fl</sup>; top).
